# Supplementary material for: Demonstration of Protein-Based Human Identification Using the Hair Shaft Proteome
Source: PubMed Central journal article supplement (PMC5014411; doi:10.1371/journal.pone.0160653), 2016-09-07
Supplement: pone.0160653.s004.pdf [file pone.0160653.s004.pdf]

Spreadsheet 56 Paralogy Analysis of SAP-containing Peptides in the Hair Proteome

| GN        | Frequency      | EUR            | AFR    | me                         | ref      | Ch                   | peptide                                                                                  |
|-----------|----------------|----------------|--------|----------------------------|----------|----------------------|------------------------------------------------------------------------------------------|
| BLMH      | 0.562<br>0.884 | 0.378<br>0.927 | A<br>G | r15050565                  | 17       | 1443V                | HVPEEVLAVLEGEPIPLAWDPVNGALAA                                                             |
| COL4A4    | 0.691<br>0.821 | 0.87<br>0.915  | A<br>T | r13724895<br>r13724895     | 2<br>2   | S1403P<br>S1403P     | GPFGCKGKPEGLDGR<br>GPFGCKGKPEGLDGR                                                       |
| DSP       | 0.269<br>0.984 | 0.642<br>0.858 | A<br>G | r6929069<br>r6929069       | 6<br>6   | R1738Q<br>R1738Q     | GISEADSDKNATLEER<br>GISEADSDKNATLEER                                                     |
| GSDMA     | 0.491<br>0.812 | 0.642<br>0.915 | A<br>T | r13894194<br>r13894194     | 17<br>17 | R18Q<br>R18Q         | GGTFLDSDIDFK<br>GQNFQGLTFLSDIDFK                                                         |
| GSDMA     | 0.699<br>0.784 | 0.476<br>0.894 | C<br>C | r156030650<br>r156030650   | 17<br>17 | T314N<br>T314N       | GHEIVLEALPK<br>GHEIVLEALPK                                                               |
| GSDMA     | 0.731<br>0.781 | 0.227<br>0.979 | A<br>T | r17212938<br>r17212938     | 17<br>17 | V128L<br>V128L       | ALLETQER<br>ALLETQER                                                                     |
| GSTP1     | 0.544<br>0.905 | 0.712<br>0.826 | G<br>A | r11695<br>r11695           | 11<br>11 | I105V<br>I105V       | YSLYHTNYEAGDDYVK<br>YSLYHTNYEAGDDYVK                                                     |
| HEX B     | 0.264<br>0.971 | 0.028<br>0.859 | G<br>A | r118085890<br>r118085890   | 5<br>5   | I207V<br>I207V       | GILDTSR<br>GILDTSR                                                                       |
| HIST1H17  | 0.712<br>0.792 | 0.859<br>0.582 | C<br>G | r1198844<br>r1198844       | 6<br>6   | V34L<br>V34L         | MSETVPAASASAGAAAMEKLPFK<br>MSETVPAASASAGAAAMEKLPFK                                       |
| IJP       | 0.121<br>1     | 0.02<br>1      | T<br>C | r141293425<br>r141293425   | 17<br>17 | R142H<br>R142H       | SAVHVIHQDDELATLAPETFK<br>SAVHVIHQDDELATLAPETFK                                           |
| JUP       | 0.013<br>1     | 0<br>1         | T<br>C | r1143048362<br>r1143048362 | 17<br>17 | V648<br>V648         | NEGATYAAALFR<br>NEGATYAAALFR                                                             |
| KRT1      | 0.042<br>0.169 | 0<br>0.005     | A<br>A | r117678945<br>r16503427    | 12<br>17 | A45AS<br>A82V        | NKLNLEDALQKEDLAR<br>DNLEENLR                                                             |
| KRT11     | 0.05<br>0      | 0.004<br>0.004 | A<br>T | r112544857<br>r154027884   | 17<br>17 | A234V<br>V431M       | SOYEALETNR<br>QNYEQLTDLWR                                                                |
| KRT12     | 0.748<br>0.682 | 0.493<br>0.663 | A<br>A | r12071561<br>r12071563     | 17<br>17 | S222Y<br>T395M       | ADLEAQVLELK<br>LEGENMYR                                                                  |
| KRT13     | 0.833<br>0.459 | 0.796<br>0.098 | A<br>T | r12071563<br>r172830046    | 17<br>17 | T395M<br>R280H       | LEGENMYR<br>COYEAMVEANR                                                                  |
| KRT33A    | 0.939<br>0.446 | 0.939<br>0.597 | C<br>A | r172830046<br>r123937519   | 17<br>17 | R280H<br>A270V       | COYEAMVEANR<br>QVSSSLQDSDYHELEK                                                          |
| KRT39     | 0<br>0         | 0.002<br>0     | C<br>A | r114458849<br>r114458849   | 17<br>17 | V278K<br>V278K       | SOYEALETNR<br>SOYEALETNR                                                                 |
| KRT35     | 0.575<br>0.702 | 0.089<br>0.451 | A<br>A | r12397016<br>r1743686      | 12<br>17 | I238T<br>S36P        | SOYEALETNR<br>VSAMYSSTCKLPSLSPVAR                                                        |
| KRT35     | 0.778<br>0.708 | 0.927<br>0.623 | G<br>A | r1743686<br>r12071601      | 17<br>17 | S36P<br>P443A        | VSAMYSSTCKLPSLSPVAR<br>TNCSPRPICVPCGGFR                                                  |
| KRT35     | 0.798<br>0.306 | 0.859<br>0.134 | A<br>T | r12071601<br>r112451652    | 17<br>17 | P443A<br>C441Y       | TNCSPRPICVPCGGFR<br>TNSPRPICVPCGGFR                                                      |
| KRT35     | 0.958<br>1     | 0.988<br>0     | A<br>T | r112451652<br>r118303882   | 17<br>17 | C441Y<br>R163W       | TNCSPRPICVPCGGFR<br>YETVSLQLVESDINGLR                                                    |
| KRT37     | 0.475<br>0.934 | 0.297<br>0.963 | A<br>A | r10910204<br>r10910204     | 17<br>17 | G13C<br>G13C         | TSFSTSSCPCTMAAPGAR<br>TSFSTSSCPCTMAAPGAR                                                 |
| KRT39     | 0<br>0         | 0.02<br>1      | T<br>C | r1142154718<br>r1142154718 | 17<br>17 | S86N<br>S86N         | FSLDCCWYGGESINEK<br>FSLDCCWYGGESINEK                                                     |
| KRT40     | 0.433<br>0.931 | 0.11<br>0.952  | G<br>A | r110812789<br>r110812789   | 17<br>17 | C349R<br>C349R       | TASALEELDAQSLTSELCTVETAEQVSSQAQCLDNLNLEAER<br>TASALEELDAQSLTSELCTVETAEQVSSQAQCLDNLNLEAER |
| KRT40     | 0.647<br>0.816 | 0.925<br>0.474 | C<br>T | r12010027<br>r12010027     | 17<br>17 | R235H<br>R235H       | NHEEIVNLIHQDGR<br>NHEEIVNLIHQDGR                                                         |
| KRT81     | 0.382<br>0.56  | 0.045<br>0.122 | A<br>T | r15650073<br>r12071588     | 12<br>12 | R248L<br>G52R        | LYEEELIQSHSDTSYVK<br>GLTGGFGSVCV                                                         |
| KRT81     | 0.008<br>1     | 0.419<br>0.843 | G<br>A | r179897879<br>r179897879   | 12<br>12 | S13R<br>F10ACGPPRGR  | F10ACGPPRGR<br>F10ACGPPRGR                                                               |
| KRT82     | 0.734<br>0.797 | 0.569<br>0.878 | A<br>A | r12658658<br>r12658658     | 12<br>12 | T458M<br>T458M       | GALYEPGVSVPLVSTGLR<br>GALYEPGVSVPLVSTGLR                                                 |
| KRT83     | 0.863<br>0.62  | 0.768<br>0.728 | C<br>T | r12652464<br>r12652464     | 12<br>12 | I279M<br>DUNMDCVAEK  | DUNMDCVAEK<br>DUNMDCVAEK                                                                 |
| KRT83     | 0<br>0         | 0.077<br>0     | T<br>A | r114063030<br>r114063030   | 12<br>12 | G362S<br>G362S       | LEAAVAQSDQEAALSADAR<br>LEAAVAQSDQEAALSADAR                                               |
| KRT84     | 0.48<br>0.942  | 0.167<br>0.996 | A<br>G | r1951773<br>r1951773       | 12<br>12 | C468R<br>C468R       | CEYQLMNAKGLDHLIATYR<br>CEYQLMNAKGLDHLIATYR                                               |
| KRT85     | 0.092<br>1     | 0.041<br>0     | A<br>G | r16143004<br>r16143004     | 12<br>12 | R78H<br>R78H         | IAVGGFRAGSGCGR<br>IAVGGFRAGSGCGR                                                         |
| KRT86     | 0<br>0         | 0.065<br>0     | T<br>A | r113895699<br>r113895699   | 12<br>12 | R327C<br>TKLEINLMDIR | TKLEINLMDIR<br>TKLEINLMDIR                                                               |
| KRTAP10-B | 0.095<br>0.997 | 0.089<br>1     | A<br>G | r1411254<br>r1411254       | 21<br>21 | H26R<br>H26R         | TYVAASTVYSSDVG<br>TYVAASTVYSSDVG                                                         |
| LRR1C15   | 0.395<br>0.944 | 0.154<br>0.984 | A<br>A | r113070515<br>r113070515   | 3<br>3   | P286L<br>P286L       | ELSGIFGPMNLR<br>ELSGIFGPMNLR                                                             |
| LRR1C15   | 0.443<br>0.937 | 0.374<br>0.955 | T<br>C | r113060627<br>r113060627   | 3<br>3   | V270L<br>V270L       | LYSNHSHQSLPFIQMLQPLNR<br>LYSNHSHQSLPFIQMLQPLNR                                           |
| NEU2      | 0.755<br>0.778 | 0.973<br>0.285 | C<br>A | r12233391<br>r12233391     | 2<br>2   | H168N<br>H168N       | EWSTFAVGRHQLQIDR<br>EWSTFAVGRHQLQIDR                                                     |
| PKP1      | 0.021<br>1     | 0<br>1         | T<br>G | r161818256<br>r161818256   | 1<br>1   | R684W<br>R684W       | AAEAAILLSMWSK<br>AAEAAILLSMWSK                                                           |
| S100A3    | 0.085<br>0.998 | 0.589<br>0.858 | T<br>C | r13602742<br>r13602742     | 1<br>1   | R3K<br>R3K           | AIPLEQAVAAVCTGQYAGR<br>AIPLEQAVAAVCTGQYAGR                                               |
| SERPINSB  | 0.52<br>0.731  | 0.74<br>0.297  | T<br>T | r11455555<br>r11455555     | 18<br>18 | I319V<br>I319V       | GVALSINVHK<br>GVALSINVHK                                                                 |
| TM3       | 0.317<br>0.982 | 0.696<br>0.838 | G<br>T | r1214803<br>r1214803       | 20<br>20 | T13K<br>T13K         | AAAGVDSINWQIFAFNR<br>AAAGVDSINWQIFAFNR                                                   |

Comment on tblastn analysis

Only one significant hit in the human genome reference assembly; to BLMH on chromosome 17. The indicated polymorphism is present in the transcript database, and is therefore a reliable SAP. No evidence of false polymorphism due to paralogy.

Only one significant hit in the human genome reference assembly; to COL4A4 transcript variant X5, no significant similarity in genome search (possibly intron disruption)

Only one significant hit in the human genome reference assembly; to COL4A4 transcript variant X5, no significant similarity in genome search (possibly intron disruption)

Only one significant hit in the human genome reference assembly; to DSP on chromosome 6. The indicated polymorphism is not present in the transcript database but the SAP is likely to be reliable. No evidence of false polymorphism due to paralogy.

Only one significant hit in the human genome reference assembly; to GSDMA on chromosome 17. Also detected in mRNA but with no variants detected. No evidence of false polymorphism due to paralogy.

Only one significant hit in the human genome reference assembly; to GSDMA on chromosome 17. Also detected in mRNA but with no variants detected. No evidence of false polymorphism due to paralogy.

No significant similarity detected with a tblastn search; sequence too short.

No significant similarity detected with a tblastn search; sequence too short.

No significant similarity detected with a tblastn search; sequence too short.

One match to GSTP1 mRNAs, including the indicated polymorphism, no significant similarity in genome search (possibly intron disruption)

One match to GSTP1 mRNAs, including the indicated polymorphism, no significant similarity in genome search (possibly intron disruption)

No significant similarity detected with a tblastn search; sequence too short.

No significant similarity detected with a tblastn search; sequence too short.

Histone H11, other significant matches had several amino acid differences. No evidence of false polymorphism due to paralogy.

Histone H11, other significant matches had several amino acid differences. No evidence of false polymorphism due to paralogy.

Two matches, to IJP on chromosome 17 and CTNBL1 on chromosome 3. There are several fixed variants that confirm the peptide undoubtedly belongs to IJP. Therefore there is no evidence of false polymorphism due to paralogy.

Two matches, to IJP on chromosome 17 and CTNBL1 on chromosome 3. There are several fixed variants that confirm the peptide undoubtedly belongs to IJP. Therefore there is no evidence of false polymorphism due to paralogy.

One match to JUP in mRNAs. No significant similarity in genome search, possibly due to intron disruption. No evidence of false polymorphism due to paralogy.

One match to JUP in mRNAs. No significant similarity in genome search, possibly due to intron disruption. No evidence of false polymorphism due to paralogy.

Two matches to tandem copies of KRT1 and KRT2, KRT2, however, contains a variable amino acid residue within this peptide that confirms the peptide belongs to KRT1. Therefore, there is no evidence of a false polymorphism due to paralogy. All mRNA sequences contain the ancestral variant.

No significant similarity detected with a tblastn search; sequence too short.

No significant similarity detected with a tblastn search; sequence too short.

No significant similarity detected with a tblastn search; sequence too short.

No significant similarity detected with a tblastn search; sequence too short.

One match to KRT32 with no detection of polymorphism in mRNAs. No evidence of false polymorphism due to paralogy.

One match to KRT32 with no detection of polymorphism in mRNAs. No evidence of false polymorphism due to paralogy.

Multiple matches in genome search, all within the KRT gene family on chromosome 17, including pseudogenes, with no distinguishing variants elsewhere in the sequence. The mRNA search, however, revealed two mRNAs with the derived A270V variant, both from KRT33A, so the polymorphism is probably in this gene.

Multiple matches in genome and mRNA search to KRT gene family on chromosome 17, including pseudogenes. None of the mRNAs contained the I238T variant, so the gene to which this variant belongs cannot be conclusively identified by this method. There is a possibility of a false polymorphism due to paralogy.

No significant similarity detected with a tblastn search; sequence too short.

One match to KRT35 in genomic assembly and in mRNA sequences. S36P variant not detected in any sequence. No evidence of false polymorphism due to paralogous sequences.

One match to KRT35 in genomic assembly and in mRNA sequences. S36P variant not detected in any sequence. No evidence of false polymorphism due to paralogous sequences.

One match to KRT35 in genomic assembly and in mRNA sequences. P443A variant detected in mRNA sequences. No evidence of false polymorphism due to paralogous sequences.

One match to KRT35 in genomic assembly and in mRNA sequences. C441 variant not detected in mRNA sequences. No evidence of false polymorphism due to paralogous sequences. There is a common variant at N440T present in several of the mRNA sequences.

One match to KRT35 in genomic assembly and in mRNA sequences. C441 variant not detected in mRNA sequences. No evidence of false polymorphism due to paralogous sequences. There is a common variant at N440T present in several of the mRNA sequences.

Multiple matches in genome search, all within the KRT gene family on chromosome 17, including pseudogenes, but with at least one distinguishing variant. Best match is KRT35. No evidence of R163W variant in mRNA. No evidence of false polymorphism due to paralogy.

Multiple matches in genome search, all within the KRT gene family on chromosome 17, including pseudogenes, but with at least one distinguishing variant. Best match is KRT35. No evidence of R163W variant in mRNA. No evidence of false polymorphism due to paralogy.

One match to KRT37 in both genomic and mRNA databases. No evidence of G13C variant in mRNAs. No evidence of false polymorphism due to paralogy.

One match to KRT37 in both genomic and mRNA databases. No evidence of G13C variant in mRNAs. No evidence of false polymorphism due to paralogy.

One match to KRT39 in both genomic and mRNA databases. No evidence of S86N variant in mRNAs. No evidence of false polymorphism due to paralogy.

One match to KRT39 in both genomic and mRNA databases. No evidence of S86N variant in mRNAs. No evidence of false polymorphism due to paralogy.

One match to KRT40 in both genomic and mRNA databases. C349R variant detected in mRNAs. No evidence of false polymorphism due to paralogy.

One match to KRT40 in both genomic and mRNA databases. C349R variant detected in mRNAs. No evidence of false polymorphism due to paralogy.

One match to KRT40 in both genomic and mRNA databases, albeit with two variants in the genomic database. The protein database, however, shows a complete 100% match. No evidence of false polymorphism due to paralogy.

One match to KRT81 in both genomic and mRNA databases, albeit with several variants in the genomic database. The protein and mRNA databases, however, show 100% identity across the entire sequence. No evidence of false polymorphism due to paralogy.

100% match to mRNA incorrectly identified as KRT86; according to my own analysis, it's a better match to KRT81, including the G52R variant in the mRNA database (emb|179206.1). No evidence of false polymorphism due to paralogy.

One match to KRT81 in both genomic and mRNA databases. All mRNAs have the ancestral sequence. No evidence of false polymorphism due to false paralogy.

One match to KRT81 in both genomic and mRNA databases. All mRNAs have the ancestral sequence. No evidence of false polymorphism due to false paralogy.

One match to KRT82 in both genomic and mRNA databases. All mRNAs have the ancestral sequence. No evidence of false polymorphism due to paralogy.

One match to KRT82 in both genomic and mRNA databases. All mRNAs have the ancestral sequence. No evidence of false polymorphism due to paralogy.

No significant similarity detected with a tblastn search.

No significant similarity detected with a tblastn search.

Multiple matches in genome and mRNA search to KRT gene family on chromosome 12, including pseudogenes. None of the mRNAs contained the G362S variant, so the gene to which this variant belongs cannot be conclusively identified by this method. There is a possibility of a false polymorphism due to paralogy.

One match to KRT84. No evidence of false polymorphism due to paralogy.

One match to KRT84. No evidence of false polymorphism due to paralogy.

One match to KRT85, R78H polymorphism not detected. No evidence of false polymorphism due to paralogy.

Best match is KRT81 and some KRT pseudogenes. Uncertain. Possible false polymorphism.

One match to KRTAP10-B. H26R variant is present in the mRNA database. No evidence of false polymorphism due to paralogy.

One match to KRTAP10-B. H26R variant is present in the mRNA database. No evidence of false polymorphism due to paralogy.

One match to LRR1C15. P286I polymorphism is in the mRNA database. No evidence of false polymorphism.

One match to LRR1C15. P286I polymorphism is in the mRNA database. No evidence of false polymorphism.

One match to LRR1C15. V270L polymorphism not detected in the mRNA database. No evidence of false polymorphism.

One match to LRR1C15. V270L polymorphism not detected in the mRNA database. No evidence of false polymorphism.

One match to NEU2. H168N polymorphism is present in the mRNA database. No evidence of false polymorphism.

One match to NEU2. H168N polymorphism is present in the mRNA database. No evidence of false polymorphism.

One match to PKP1. R684W polymorphism is not detected in the mRNA database. No evidence of false polymorphism.

One match to PKP1. R684W polymorphism is not detected in the mRNA database. No evidence of false polymorphism.

One match to S100A3. R3K polymorphism is not detected in the mRNA database. No evidence of false polymorphism.

One match to S100A3. R3K polymorphism is not detected in the mRNA database. No evidence of false polymorphism.

No significant similarity detected with a tblastn search.

No significant similarity detected with a tblastn search.

One match to TM3. T13K polymorphism is present in the mRNA database. No evidence of false polymorphism.

One match to TM3. T13K polymorphism is present in the mRNA database. No evidence of false polymorphism.
