# Supplementary material for: Demonstration of Protein-Based Human Identification Using the Hair Shaft Proteome
Source: PubMed Central journal article supplement (PMC5014411; doi:10.1371/journal.pone.0160653), 2016-09-07
Supplement: pone.0160653.s005.pdf [file pone.0160653.s005.pdf]

| <b>rank</b> | <b>UNIPROT #</b> | <b>protein name</b>                                  |
|-------------|------------------|------------------------------------------------------|
| 1           | KRT86_HUMAN      | Keratin, type II cuticular Hb6                       |
| 2           | KRT85_HUMAN      | Keratin, type II cuticular Hb5                       |
| 3           | K1H1_HUMAN       | Keratin, type I cuticular Ha1                        |
| 4           | KT33B_HUMAN      | Keratin, type I cuticular Ha3-II                     |
| 5           | KT33A_HUMAN      | Keratin, type I cuticular Ha3-I                      |
| 6           | KRT83_HUMAN      | Keratin, type II cuticular Hb3                       |
| 7           | KRT34_HUMAN      | Keratin, type I cuticular Ha4                        |
| 8           | TRY1_BOVIN       | Pancreatic Trypsin                                   |
| 9           | KRT81_HUMAN      | Keratin, type II cuticular Hb1                       |
| 10          | KRT82_HUMAN      | Keratin, type II cuticular Hb2                       |
| 11          | KRA31_HUMAN      | Keratin-associated protein 3-1                       |
| 12          | KR111_HUMAN      | Keratin-associated protein 11-1                      |
| 13          | KRA32_HUMAN      | Keratin-associated protein 3-2                       |
| 14          | DESP_HUMAN       | Desmoplakin                                          |
| 15          | ICAM2_HUMAN      | Intercellular adhesion molecule 2                    |
| 16          | VSIG8_HUMAN      | V-set and immunoglobulin domain-containing protein 8 |
| 17          | K1H2_HUMAN       | Keratin, type I cuticular Ha2                        |
| 18          | S10A3_HUMAN      | Protein S100-A3                                      |
| 19          | KRT35_HUMAN      | Keratin, type I cuticular Ha5                        |
| 20          | DSG4_HUMAN       | Desmoglein-4                                         |
| 21          | PKP1_HUMAN       | Plakophilin-1                                        |
| 22          | SBP1_HUMAN       | Selenium-binding protein 1                           |
| 23          | KRA43_HUMAN      | Keratin-associated protein 4-3                       |
| 24          | KRA33_HUMAN      | Keratin-associated protein 3-3                       |
| 25          | K1C39_HUMAN      | Keratin, type I cytoskeletal 39                      |
| 26          | CALL3_HUMAN      | Calmodulin-like protein 3                            |
| 27          | KRA92_HUMAN      | Keratin-associated protein 9-2                       |
| 28          | TGM3_HUMAN       | Protein-glutamine gamma-glutamyltransferase E        |
| 29          | KR132_HUMAN      | Keratin-associated protein 13-2                      |
| 30          | TRI29_HUMAN      | Tripartite motif-containing protein 29               |
| 31          | KR261_HUMAN      | Keratin-associated protein 26-1                      |
| 32          | 1433S_HUMAN      | 14-3-3 protein sigma                                 |
| 33          | LEG3_HUMAN       | Galectin-3                                           |
| 34          | KRT38_HUMAN      | Keratin, type I cuticular Ha8                        |
| 35          | ATPA_HUMAN       | ATP synthase subunit alpha, mitochondrial            |
| 36          | G3P_HUMAN        | Glyceraldehyde-3-phosphate dehydrogenase             |
| 37          | CH60_HUMAN       | 60 kDa heat shock protein, mitochondria              |
| 38          | KRA44_HUMAN      | Keratin-associated protein 4-4                       |
| 39          | PLAK_HUMAN       | Junction plakoglobin                                 |
| 40          | LEG7_HUMAN       | Galectin-7                                           |
| 41          | KRA98_HUMAN      | Keratin-associated protein 9-8                       |

42 DUS14\_HUMAN Dual specificity protein phosphatase 14  
43 KRA93\_HUMAN Keratin-associated protein 9-3  
44 TBA1B\_HUMAN Tubulin alpha-1B chain  
45 ATPB\_HUMAN ATP synthase subunit beta, mitochondrial  
46 LEG1\_HUMAN Galectin-1  
47 MIF\_HUMAN Macrophage migration inhibitory factor  
48 GDPD3\_HUMAN Glycerophosphodiester phosphodiesterase domain-containing protein 3  
49 KRA99\_HUMAN Keratin-associated protein 9-9  
50 ADT2\_HUMAN ADP/ATP translocase 2  
51 PLP2\_HUMAN Proteolipid protein 2  
52 KPVM\_HUMAN Pyruvate kinase PKM  
53 H4\_HUMAN Histone H4  
54 ACTG\_HUMAN Actin, cytoplasmic 2  
55 KRA91\_HUMAN Keratin-associated protein 9-1  
56 KRA97\_HUMAN Keratin-associated protein 9-7  
57 ACTB\_HUMAN Actin, cytoplasmic 1  
58 TPIS\_HUMAN Triosephosphate isomerase  
59 PRDX6\_HUMAN Peroxiredoxin-6  
60 EF2\_HUMAN Elongation factor 2  
61 HSPB1\_HUMAN Heat shock protein beta-1  
62 PMEL\_HUMAN Melanocyte protein PMEL  
63 COF1\_HUMAN Cofilin-1  
64 FABP5\_HUMAN Fatty acid-binding protein, epidermal  
65 AMPL\_HUMAN Cytosol aminopeptidase  
66 H2A2A\_HUMAN Histone H2A type 2-A  
67 PPIA\_HUMAN Peptidyl-prolyl cis-trans isomerase A  
68 KRT36\_HUMAN Keratin, type I cuticular Ha6  
69 ANXA2\_HUMAN Annexin A2  
70 HSP72\_HUMAN Heat shock-related 70 kDa protein 2  
71 KR131\_HUMAN Keratin-associated protein 13-1  
72 K2C1\_HUMAN Keratin, type II cytoskeletal 1  
73 SCFD1\_HUMAN Sec1 family domain-containing protein 1  
74 HCD2\_HUMAN 3-hydroxyacyl-CoA dehydrogenase type-2  
75 H2B2F\_HUMAN Histone H2B type 2-F  
76 TBA4A\_HUMAN Tubulin alpha-4A chain  
77 MDHM\_HUMAN Malate dehydrogenase, mitochondrial  
78 KRT84\_HUMAN Keratin, type II cuticular Hb4  
79 UK114\_HUMAN Ribonuclease UK114  
80 TBB2A\_HUMAN Tubulin beta-2A chain  
81 PKP3\_HUMAN Plakophilin-3  
82 KRA21\_HUMAN Keratin-associated protein 2-1  
83 GSTP1\_HUMAN Glutathione S-transferase P

84 ENOA\_HUMAN Alpha-enolase  
85 RLA1\_HUMAN 60S acidic ribosomal protein P1  
86 DSC3\_HUMAN Desmocollin-3  
87 CTNB1\_HUMAN Catenin beta-1  
88 EF1A1\_HUMAN Elongation factor 1-alpha 1  
89 KRA96\_HUMAN Keratin-associated protein 9-6  
90 KRA15\_HUMAN Keratin-associated protein 1-5  
91 K2C7\_HUMAN Keratin, type II cytoskeletal 7  
92 PLCD1\_HUMAN 1-phosphatidylinositol 4,5-bisphosphate phosphodiesterase delta-1  
93 FA26D\_HUMAN Protein FAM26D  
94 TERA\_HUMAN Transitional endoplasmic reticulum ATPase  
95 RS27A\_HUMAN Ubiquitin-40S ribosomal protein S27a  
96 1433E\_HUMAN 14-3-3 protein epsilon  
97 TBB4B\_HUMAN Tubulin beta-4B chain  
98 DHB4\_HUMAN Peroxisomal multifunctional enzyme type 2  
99 K2C80\_HUMAN Keratin, type II cytoskeletal 80  
100 VINC\_HUMAN Vinculin  
101 NEUR2\_HUMAN Sialidase-2  
102 1433Z\_HUMAN 14-3-3 protein zeta/delta  
103 PADI3\_HUMAN Protein-arginine deiminase type-3  
104 TGM1\_HUMAN Protein-glutamine gamma-glutamyltransferase K  
105 ECHD1\_HUMAN Ethylmalonyl-CoA decarboxylase  
106 BLMH\_HUMAN Bleomycin hydrolase  
107 6PGL\_HUMAN 6-phosphogluconolactonase  
108 GPNMB\_HUMAN Transmembrane glycoprotein NMB  
109 H33\_HUMAN Histone H3.3  
110 S10AE\_HUMAN Protein S100-A14  
111 PHB\_HUMAN Prohibitin  
112 SSBP\_HUMAN Single-stranded DNA-binding protein, mitochondrial  
113 GRP78\_HUMAN 78 kDa glucose-regulated protein  
114 KR241\_HUMAN Keratin-associated protein 24-1  
115 RSSA\_HUMAN 0S ribosomal protein SA  
116 KRT36\_HUMAN Keratin, type I cuticular Ha6  
117 VDAC2\_HUMAN Voltage-dependent anion-selective channel protein 2  
118 K2C5\_HUMAN Keratin, type II cytoskeletal 5  
119 C9JSQ1\_HUMAN Creatine kinase U-type, mitochondrial  
120 F16P1\_HUMAN Fructose-1,6-bisphosphatase 1  
121 THIK\_HUMAN 3-ketoacyl-CoA thiolase, peroxisomal  
122 ADT3\_HUMAN ADP/ATP translocase 3  
123 1433G\_HUMAN 14-3-3 protein gamma  
124 KR195\_HUMAN Keratin-associated protein 19-5  
125 HPHL1\_HUMAN Hephaestin-like protein 1

126 SYG\_HUMAN Glycine--tRNA ligase  
127 ALDH2\_HUMAN Aldehyde dehydrogenase, mitochondrial  
128 TBB5\_HUMAN Tubulin beta chain  
129 LYG2\_HUMAN Lysozyme g-like protein 2  
130 LDHB\_HUMAN L-lactate dehydrogenase B chain  
131 PEPL\_HUMAN Periplakin  
132 RAB7A\_HUMAN Ras-related protein Rab-7a  
133 HEXB\_HUMAN Beta-hexosaminidase subunit beta  
134 H32\_HUMAN Histone H3.2  
135 CSRP1\_HUMAN Cysteine and glycine-rich protein 1  
136 KRA81\_HUMAN Keratin-associated protein 8-1  
137 K2C75\_HUMAN Keratin, type II cytoskeletal 75  
138 KRA11\_HUMAN Keratin-associated protein 1-1  
139 CRYAB\_HUMAN Alpha-crystallin B chain  
140 KRA94\_HUMAN Keratin-associated protein 9-4  
141 SPB5\_HUMAN Serpin B5  
142 K1C10\_HUMAN Keratin, type I cytoskeletal 10  
143 COMT\_HUMAN Catechol O-methyltransferase  
144 KR161\_HUMAN Keratin-associated protein 16-1  
145 GDIB\_HUMAN Rab GDP dissociation inhibitor beta  
146 LRC15\_HUMAN Leucine-rich repeat-containing protein 15  
147 C9J9S3\_HUMAN Serine/threonine-protein phosphatase  
148 PGK1\_HUMAN Phosphoglycerate kinase 1  
149 CLIC3\_HUMAN Chloride intracellular channel protein 3  
150 H2B1J\_HUMAN Histone H2B type 1-J  
151 TCTP\_HUMAN Translationally-controlled tumor protein  
152 PRDX2\_HUMAN Peroxiredoxin-2  
153 F5H608\_HUMAN ATP synthase subunit d, mitochondrial  
154 PDIA6\_HUMAN Protein disulfide-isomerase A6  
155 APT\_HUMAN Adenine phosphoribosyltransferase  
156 H15\_HUMAN Histone H1.5  
157 CISO\_HUMAN Citrate synthase, mitochondrial  
158 H2AZ\_HUMAN Histone H2A.Z  
159 FAS\_HUMAN Fatty acid synthase  
160 H2AY\_HUMAN Core histone macro-H2A.1  
161 HSP7C\_HUMAN Heat shock cognate 71 kDa protein  
162 HYES\_HUMAN Bifunctional epoxide hydrolase 2  
163 1433F\_HUMAN 14-3-3 protein eta  
164 HS71L\_HUMAN Heat shock 70 kDa protein 1-like  
165 KR10A\_HUMAN Keratin-associated protein 10-10  
166 CTNA1\_HUMAN Catenin alpha-1  
167 EF1G\_HUMAN Elongation factor 1-gamma

168 S10AG\_HUMAN Protein S100-A16  
169 K2C6A\_HUMAN Keratin, type II cytoskeletal 6A  
170 H2B1N\_HUMAN Histone H2B type 1-N  
171 SODC\_HUMAN Superoxide dismutase [Cu-Zn]  
172 H2A3\_HUMAN Histone H2A type 3  
173 K1C40\_HUMAN Keratin, type I cytoskeletal 40  
174 ENDD1\_HUMAN Endonuclease domain-containing 1 protein  
175 H12\_HUMAN Histone H1.2  
176 ECHA\_HUMAN Trifunctional enzyme subunit alpha, mitochondrial  
177 ACTS\_HUMAN Actin, alpha skeletal muscle  
178 LMNA\_HUMAN Prelamin-A/C  
179 KRA61\_HUMAN Keratin-associated protein 6-1  
180 KRT37\_HUMAN Keratin, type I cuticular Ha7  
181 ANXA1\_HUMAN Annexin A1  
182 GFAP\_HUMAN Glial fibrillary acidic protein  
183 COX2\_HUMAN Cytochrome c oxidase subunit 2  
184 CATD\_HUMAN Cathepsin D  
185 FA83H\_HUMAN Protein FAM83H  
186 K1C19\_HUMAN Keratin, type I cytoskeletal 19  
187 RLA2\_HUMAN 60S acidic ribosomal protein P2  
188 K22E\_HUMAN Keratin, type II cytoskeletal 2 epidermal  
189 TRXR1\_HUMAN Thioredoxin reductase 1, cytoplasmic  
190 CH10\_HUMAN 10 kDa heat shock protein, mitochondrial  
191 FIS1\_HUMAN Mitochondrial fission 1 protein  
192 HNRH1\_HUMAN Heterogeneous nuclear ribonucleoprotein H  
193 PRDX1\_HUMAN Peroxiredoxin-1  
194 LAMP1\_HUMAN Lysosome-associated membrane glycoprotein 1  
195 VATA\_HUMAN V-type proton ATPase catalytic subunit A  
196 TAGL2\_HUMAN Transgelin-2  
197 UBP5\_HUMAN Ubiquitin carboxyl-terminal hydrolase 5  
198 GSDMA\_HUMAN Gasdermin-A

| primary acc # | Ensembl Accession | count | abundance | GN        |
|---------------|-------------------|-------|-----------|-----------|
| O43790        | ENSP00000443169   | 54    | 6.617     | KRT86     |
| P78386        | ENSP00000257901   | 54    | 6.584     | KRT85     |
| Q15323        | ENSP00000251645   | 54    | 6.493     | KRT31     |
| Q14525        | ENSP00000251646   | 54    | 6.309     | KRT33B    |
| O76009        | ENSP00000007735   | 54    | 6.265     | KRT33A    |
| P78385        | ENSP00000293670   | 53    | 6.204     | KRT83     |
| O76011        | ENSP00000377570   | 54    | 6.059     | KRT34     |
| P00760        | sp TRY1_BOVIN     | 54    | 5.876     |           |
| Q14533        | ENSP00000369349   | 49    | 5.799     | KRT81     |
| Q9NSB4        | ENSP00000257974   | 54    | 5.758     | KRT82     |
| Q9BYR8        | ENSP00000375430   | 53    | 5.698     | KRTAP3-1  |
| Q8IUC1        | ENSP00000330720   | 53    | 5.591     | KRTAP11-1 |
| Q9BYR7        | ENSP00000375429   | 51    | 5.404     | KRTAP3-2  |
| P15924        | ENSP00000369129   | 52    | 5.376     | DSP       |
| P13598        | ENSP00000415283   | 50    | 5.274     | ICAM2     |
| Q5VU13        | ENSP00000357080   | 54    | 5.241     | VSIG8     |
| Q14532        | ENSP00000225899   | 51    | 5.201     | KRT32     |
| P33764        | ENSP00000357702   | 52    | 5.173     | S100A3    |
| Q92764        | ENSP00000377558   | 48    | 5.057     | KRT35     |
| Q86SJ6        | ENSP00000311859   | 52    | 4.967     | DSG4      |
| Q13835        | ENSP00000356293   | 51    | 4.940     | PKP1      |
| Q13228        | ENSP00000357861   | 51    | 4.893     | SELENBP1  |
| Q9BYR4        | ENSP00000375151   | 52    | 4.825     | KRTAP4-3  |
| Q9BYR6        | ENSP00000375428   | 46    | 4.787     | KRTAP3-3  |
| Q6A163        | ENSP00000347823   | 51    | 4.772     | KRT39     |
| P27482        | ENSP00000315299   | 53    | 4.736     | CALML3    |
| Q9BYQ4        | ENSP00000366950   | 45    | 4.732     | KRTAP9-2  |
| Q08188        | ENSP00000370867   | 50    | 4.672     | TGM3      |
| Q52LG2        | ENSP00000382777   | 51    | 4.610     | KRTAP13-2 |
| Q14134        | ENSP00000343129   | 50    | 4.495     | TRIM29    |
| Q6PEX3        | ENSP00000353742   | 52    | 4.471     | KRTAP26-1 |
| P31947        | ENSP00000340989   | 49    | 4.470     | SFN       |
| P17931        | ENSP00000254301   | 47    | 4.414     | LGALS3    |
| O76015        | ENSP00000246646   | 46    | 4.390     | KRT38     |
| P25705        | ENSP00000381736   | 46    | 4.365     | ATP5A1    |
| P04406        | ENSP00000229239   | 46    | 4.204     | GAPDH     |
| P10809        | ENSP00000373620   | 48    | 4.188     | HSPD1     |
| Q9BYR3        | ENSP00000375076   | 45    | 4.186     | KRTAP4-4  |
| P14923        | ENSP00000377507   | 43    | 4.126     | JUP       |
| P47929        | ENSP00000367891   | 43    | 4.058     | LGALS7    |
| Q9BYQ0        | ENSP00000254072   | 38    | 4.022     | KRTAP9-8  |

|        |                 |    |                  |
|--------|-----------------|----|------------------|
| O95147 | ENSP00000377912 | 43 | 3.934 DUSP14     |
| Q9BYQ3 | ENSP00000392189 | 36 | 3.830 KRTAP9-3   |
| P68363 | ENSP00000336799 | 43 | 3.788 TUBA1B     |
| P06576 | ENSP00000262030 | 42 | 3.713 ATP5B      |
| P09382 | ENSP00000215909 | 44 | 3.650 LGALS1     |
| P14174 | ENSP00000215754 | 42 | 3.626 MIF        |
| Q7L5L3 | ENSP00000384363 | 43 | 3.597 GDPD3      |
| Q9BYP9 | ENSP00000415438 | 33 | 3.516 KRTAP9-9   |
| P05141 | ENSP00000360671 | 42 | 3.496 SLC25A5    |
| Q04941 | ENSP00000365505 | 41 | 3.450 PLP2       |
| P14618 | ENSP00000455736 | 40 | 3.377 PKM        |
| P62805 | ENSP00000376669 | 36 | 3.359 HIST1H4A   |
| P63261 | ENSP00000331514 | 34 | 3.282 ACTG1      |
| A8MXZ3 | ENSP00000381488 | 32 | 3.239 KRTAP9-1   |
| A8MTY7 | ENSP00000375149 | 31 | 3.228 KRTAP9-7   |
| P60709 | ENSP00000349960 | 33 | 3.212 ACTB       |
| P60174 | ENSP00000229270 | 36 | 3.186 TPI1       |
| P30041 | ENSP00000342026 | 38 | 3.176 PRDX6      |
| P13639 | ENSP00000307940 | 36 | 3.165 EEF2       |
| P04792 | ENSP00000248553 | 37 | 3.136 HSPB1      |
| P40967 | ENSP00000402758 | 37 | 3.011 PMEL       |
| P23528 | ENSP00000432660 | 36 | 2.936 CFL1       |
| Q01469 | ENSP00000297258 | 34 | 2.861 FABP5      |
| P28838 | ENSP00000226299 | 32 | 2.843 LAP3       |
| Q6FI13 | ENSP00000358158 | 31 | 2.827 HIST2H2AA3 |
| P62937 | ENSP00000419425 | 31 | 2.800 PPIA       |
| O76013 | ENSP00000377555 | 31 | 2.765 KRT36      |
| P07355 | ENSP00000379342 | 30 | 2.749 ANXA2      |
| P54652 | ENSP00000378199 | 30 | 2.708 HSPA2      |
| Q8IUC0 | ENSP00000347635 | 29 | 2.672 KRTAP13-1  |
| P04264 | ENSP00000252244 | 31 | 2.647 KRT1       |
| Q8WVM8 | ENSP00000390783 | 32 | 2.647 SCFD1      |
| Q99714 | ENSP00000168216 | 31 | 2.602 HSD17B10   |
| Q5QNW6 | ENSP00000358164 | 28 | 2.553 HIST2H2BF  |
| P68366 | ENSP00000248437 | 29 | 2.518 TUBA4A     |
| P40926 | ENSP00000327070 | 29 | 2.486 MDH2       |
| Q9NSB2 | ENSP00000257951 | 25 | 2.486 KRT84      |
| P52758 | ENSP00000254878 | 29 | 2.451 HRSP12     |
| Q13885 | ENSP00000369703 | 25 | 2.342 TUBB2A     |
| Q9Y446 | ENSP00000331678 | 26 | 2.289 PKP3       |
| Q9BYU5 | ENSP00000375238 | 26 | 2.286 KRTAP2-1   |
| P09211 | ENSP00000381607 | 27 | 2.285 GSTP1      |

|        |                 |    |                 |
|--------|-----------------|----|-----------------|
| P06733 | ENSP00000234590 | 26 | 2.278 ENO1      |
| P05386 | ENSP00000346037 | 27 | 2.277 RPLP1     |
| Q14574 | ENSP00000353608 | 26 | 2.194 DSC3      |
| P35222 | ENSP00000385604 | 24 | 2.185 CTNNB     |
| P68104 | ENSP00000339063 | 26 | 2.174 EEF1A1    |
| A8MVA2 | ENSP00000375150 | 22 | 2.159 KRTAP9-6  |
| Q9BYS1 | ENSP00000355302 | 21 | 2.129 KRTAP1-5  |
| P08729 | ENSP00000444547 | 21 | 2.059 KRT7      |
| P51178 | ENSP00000430344 | 24 | 2.051 PLCD1     |
| Q5JW98 | ENSP00000385836 | 24 | 2.047 FAM26D    |
| P55072 | ENSP00000351777 | 23 | 1.962 VCP       |
| P62979 | ENSP00000383981 | 22 | 1.896 RPS27A    |
| P62258 | ENSP00000264335 | 21 | 1.864 YWHAE     |
| P68371 | ENSP00000341289 | 20 | 1.858 TUBB4B    |
| P51659 | ENSP00000256216 | 22 | 1.817 HSD17B4   |
| Q6KB66 | ENSP00000369361 | 22 | 1.769 KRT80     |
| P18206 | ENSP00000361841 | 22 | 1.764 VCL       |
| Q9Y3R4 | ENSP00000233840 | 21 | 1.715 NEU2      |
| P63104 | ENSP00000379287 | 19 | 1.667 YWHAZ     |
| Q9ULW8 | ENSP00000364609 | 20 | 1.659 PADI3     |
| P22735 | ENSP00000206765 | 20 | 1.658 TGM1      |
| Q9NTX5 | ENSP00000401751 | 20 | 1.633 ECHDC1    |
| Q13867 | ENSP00000261714 | 19 | 1.627 BLMH      |
| O95336 | ENSP00000252603 | 20 | 1.606 PGLS      |
| Q14956 | ENSP00000258733 | 18 | 1.597 GPNMB     |
| P84243 | ENSP00000355781 | 18 | 1.559 H3F3A     |
| Q9HCY8 | ENSP00000420296 | 19 | 1.551 S100A14   |
| P35232 | ENSP00000300408 | 19 | 1.548 PHB       |
| Q04837 | ENSP00000265304 | 20 | 1.546 SSBP1     |
| P11021 | ENSP00000324173 | 17 | 1.545 HSPA5     |
| Q3LI83 | ENSP00000339238 | 17 | 1.491 KRTAP24-1 |
| P08865 | ENSP00000346067 | 18 | 1.489 RPSA      |
| O76013 | ENSP00000329165 | 16 | 1.486 KRT36     |
| P45880 | ENSP00000298468 | 18 | 1.482 VDAC2     |
| P13647 | ENSP00000252242 | 16 | 1.478 KRT5      |
| C9JSQ1 | ENSP00000413999 | 17 | 1.429 CKMT1B    |
| P09467 | ENSP00000364475 | 17 | 1.409 FBP1      |
| P09110 | ENSP00000333664 | 17 | 1.401 ACAA1     |
| P12236 | ENSP00000370808 | 18 | 1.387 SLC25A6   |
| P61981 | ENSP00000306330 | 17 | 1.372 YWHAG     |
| Q3LI72 | ENSP00000334985 | 16 | 1.350 KRTAP19-5 |
| Q6MZM0 | ENSP00000313699 | 16 | 1.334 HEPHL1    |



|        |                 |    |                  |
|--------|-----------------|----|------------------|
| P41250 | ENSP00000373918 | 16 | 1.329 GARS       |
| P05091 | ENSP00000403349 | 16 | 1.324 ALDH2      |
| P07437 | ENSP00000339001 | 14 | 1.319 TUBB       |
| Q86SG7 | ENSP00000386939 | 15 | 1.288 LYG2       |
| P07195 | ENSP00000379386 | 16 | 1.260 LDHB       |
| O60437 | ENSP00000340510 | 15 | 1.233 PPL        |
| P51149 | ENSP00000265062 | 15 | 1.213 RAB7A      |
| P07686 | ENSP00000426285 | 15 | 1.194 HEXB       |
| Q71DI3 | ENSP00000333277 | 14 | 1.191 HIST2H3A   |
| P21291 | ENSP00000356275 | 15 | 1.189 CSRP1      |
| Q8IUC2 | ENSP00000332805 | 15 | 1.182 KRTAP8-1   |
| O95678 | ENSP00000252245 | 12 | 1.121 KRT75      |
| Q07627 | ENSP00000305975 | 11 | 1.093 KRTAP1-1   |
| P02511 | ENSP00000436051 | 13 | 1.086 CRYAB      |
| Q9BYQ2 | ENSP00000334922 | 10 | 1.084 KRTAP9-4   |
| P36952 | ENSP00000372221 | 13 | 1.072 SERPINB5   |
| P13645 | ENSP00000269576 | 12 | 1.066 KRT10      |
| P21964 | ENSP00000354511 | 13 | 1.060 COMT       |
| A8MUX0 | ENSP00000375147 | 13 | 1.053 KRTAP16-1  |
| P50395 | ENSP00000369538 | 13 | 1.043 GDI2       |
| Q8TF66 | ENSP00000306276 | 12 | 1.039 LRRC15     |
| C9J9S3 | ENSP00000398839 | 13 | 1.000 PPP1CB     |
| P00558 | ENSP00000362413 | 12 | 0.982 PGK1       |
| O95833 | ENSP00000419378 | 12 | 0.972 CLIC3      |
| P06899 | ENSP00000342886 | 10 | 0.971 HIST1H2BJ  |
| P13693 | ENSP00000431872 | 12 | 0.946 TPT1       |
| P32119 | ENSP00000301522 | 11 | 0.935 PRDX2      |
| F5H608 | ENSP00000437996 | 11 | 0.928 ATP5H      |
| Q15084 | ENSP00000272227 | 11 | 0.928 PDIA6      |
| P07741 | ENSP00000367615 | 12 | 0.925 APRT       |
| P16401 | ENSP00000330074 | 11 | 0.923 HIST1H1B   |
| O75390 | ENSP00000446779 | 11 | 0.897 CS         |
| POC0S5 | ENSP00000296417 | 10 | 0.890 H2AFZ      |
| P49327 | ENSP00000304592 | 11 | 0.876 FASN       |
| O75367 | ENSP00000423563 | 10 | 0.871 H2AFY      |
| P11142 | ENSP00000227378 | 9  | 0.869 HSPA8      |
| P34913 | ENSP00000430269 | 11 | 0.859 EPHX2      |
| Q04917 | ENSP00000248975 | 10 | 0.852 YWHAH      |
| P34931 | ENSP00000364805 | 9  | 0.843 HSPA1L     |
| P60014 | ENSP00000369438 | 10 | 0.841 KRTAP10-10 |
| P35221 | ENSP00000304669 | 10 | 0.839 CTNNA1     |
| P26641 | ENSP00000331901 | 10 | 0.834 EEF1G      |

|        |                 |    |                 |
|--------|-----------------|----|-----------------|
| Q96FQ6 | ENSP00000357693 | 10 | 0.826 S100A16   |
| P02538 | ENSP00000369317 | 9  | 0.820 KRT6A     |
| Q99877 | ENSP00000446031 | 8  | 0.811 HIST1H2BN |
| P00441 | ENSP00000270142 | 10 | 0.811 SOD1      |
| Q7L7L0 | ENSP00000355656 | 9  | 0.804 HIST3H2A  |
| Q6A162 | ENSP00000381500 | 8  | 0.804 KRT40     |
| O94919 | ENSP00000278505 | 10 | 0.780 ENDOD1    |
| P16403 | ENSP00000339566 | 9  | 0.757 HIST1H1C  |
| P40939 | ENSP00000370023 | 9  | 0.731 HADHA     |
| P68133 | ENSP00000355645 | 8  | 0.689 ACTA1     |
| P02545 | ENSP00000357283 | 8  | 0.675 LMNA      |
| Q3LI64 | ENSP00000332690 | 9  | 0.673 KRTAP6-1  |
| O76014 | ENSP00000225550 | 7  | 0.653 KRT37     |
| P04083 | ENSP00000257497 | 8  | 0.646 ANXA1     |
| P14136 | ENSP00000253408 | 7  | 0.645 GFAP      |
| P00403 | ENSP00000354876 | 8  | 0.636 MT-CO2    |
| P07339 | ENSP00000415840 | 8  | 0.625 CTSD      |
| Q6ZRV2 | ENSP00000373565 | 8  | 0.619 FAM83H    |
| P08727 | ENSP00000355124 | 7  | 0.608 KRT19     |
| P05387 | ENSP00000322419 | 7  | 0.603 RPLP2     |
| P35908 | ENSP00000310861 | 7  | 0.593 KRT2      |
| Q16881 | ENSP00000412045 | 7  | 0.592 TXNRD1    |
| P61604 | ENSP00000233893 | 7  | 0.587 HSPE1     |
| Q9Y3D6 | ENSP00000223136 | 7  | 0.571 FIS1      |
| P31943 | ENSP00000377082 | 7  | 0.568 HNRNPH1   |
| Q06830 | ENSP00000361152 | 7  | 0.567 PRDX1     |
| P11279 | ENSP00000333298 | 7  | 0.564 LAMP1     |
| P38606 | ENSP00000273398 | 7  | 0.560 ATP6V1A   |
| P37802 | ENSP00000357077 | 7  | 0.542 TAGLN2    |
| P45974 | ENSP00000229268 | 7  | 0.534 USP5      |
| Q96QA5 | ENSP00000301659 | 7  | 0.522 GSDMA     |
