# Supplementary material for: Demonstration of Protein-Based Human Identification Using the Hair Shaft Proteome
Source: PubMed Central journal article supplement (PMC5014411; doi:10.1371/journal.pone.0160653), 2016-09-07
Supplement: pone.0160653.s006.pdf [file pone.0160653.s006.pdf]

| UniProt ID   | Overall abundance | observation | Accession # | GN        | Ensembl Accession # | fn |
|--------------|-------------------|-------------|-------------|-----------|---------------------|----|
| K1H1_HUMAN   | 8.141             | 22          | Q15323      | KRT31     | ENSP00000251645     | s  |
| KT33B_HUMAN  | 8.094             | 22          | Q14525      | KRT33B    | ENSP00000251646     | s  |
| KRT86_HUMAN  | 8.018             | 22          | O43790      | KRT86     | ENSP00000443169     | s  |
| KT33A_HUMAN  | 7.995             | 22          | O76009      | KRT33A    | ENSP00000007735     | s  |
| KRT83_HUMAN  | 7.895             | 22          | P78385      | KRT83     | ENSP00000293670     | s  |
| KRT34_HUMAN  | 7.846             | 22          | O76011      | KRT34     | ENSP00000377570     | s  |
| KRT85_HUMAN  | 7.815             | 22          | P78386      | KRT85     | ENSP00000257901     | s  |
| KRT35_HUMAN  | 7.393             | 22          | Q92764      | KRT35     | ENSP00000246639     | s  |
| KRT81_HUMAN  | 7.368             | 22          | Q14533      | KRT81     | ENSP00000369349     | s  |
| K1H2_HUMAN   | 7.266             | 22          | Q14532      | KRT32     | ENSP00000225899     | s  |
| KRT82_HUMAN  | 7.195             | 22          | Q9NSB4      | KRT82     | ENSP00000257974     | s  |
| KRT36_HUMAN  | 6.051             | 22          | O76013      | KRT36     | ENSP00000377555     | s  |
| KRT84_HUMAN  | 5.595             | 22          | Q9NSB2      | KRT84     | ENSP00000257951     | s  |
| DSG4_HUMAN   | 5.560             | 20          | Q86SJ6      | DSG4      | ENSP00000311859     | s  |
| DESP_HUMAN   | 5.514             | 19          | P15924      | DSP       | ENSP00000369129     | s  |
| K1C39_HUMAN  | 5.320             | 22          | Q6A163      | KRT39     | ENSP00000347823     | s  |
| SBP1_HUMAN   | 5.265             | 19          | Q13228      | SELENBP1  | ENSP00000357861     | pm |
| PKP1_HUMAN   | 5.148             | 19          | Q13835      | PKP1      | ENSP00000356293     | s  |
| VSIG8_HUMAN  | 5.042             | 19          | Q5VU13      | VSIG8     | ENSP00000357080     | pm |
| PLAK_HUMAN   | 5.037             | 20          | P14923      | JUP       | ENSP00000377507     | s  |
| TGM3_HUMAN   | 4.897             | 19          | Q08188      | TGM3      | ENSP00000370867     | m  |
| LEG7_HUMAN   | 4.622             | 18          | P47929      | LGALS7    | ENSP00000367891     | ex |
| CALL3_HUMAN  | 4.434             | 16          | P27482      | CALML3    | ENSP00000315299     | pr |
| 1433S_HUMAN  | 4.275             | 17          | P31947      | SFN       | ENSP00000340989     | pr |
| K2C1_HUMAN   | 4.264             | 17          | P04264      | KRT1      | ENSP00000252244     | s  |
| LEG3_HUMAN   | 4.075             | 16          | P17931      | LGALS3    | ENSP00000254301     | ex |
| ATPA_HUMAN   | 4.017             | 16          | P25705      | ATP5A1    | ENSP00000381736     | mt |
| KRT38_HUMAN  | 3.980             | 19          | O76015      | KRT38     | ENSP00000246646     | s  |
| ANXA2_HUMAN  | 3.926             | 16          | P07355      | ANXA2     | ENSP00000379342     | ml |
| ATPB_HUMAN   | 3.905             | 16          | P06576      | ATP5B     | ENSP00000262030     | mt |
| G3P_HUMAN    | 3.818             | 16          | P04406      | GAPDH     | ENSP00000229239     | m  |
| KR241_HUMAN  | 3.746             | 18          | Q3LI83      | KRTAP24-1 | ENSP00000339238     | s  |
| PPIA_HUMAN   | 3.639             | 17          | P62937      | PPIA      | ENSP00000405975     | pr |
| Q8WU19_HUMAN | 3.619             | 18          | Q8WU19      | TUBA1B    | ENSP00000336799     | s  |
| HPHL1_HUMAN  | 3.602             | 15          | Q6MZM0      | HEPHL1    | ENSP00000313699     | pm |
| DUS14_HUMAN  | 3.565             | 16          | O95147      | DUSP14    | ENSP00000377912     | pr |
| LRC15_HUMAN  | 3.560             | 16          | Q8TF66      | LRRC15    | ENSP00000306276     | pm |
| ENOA_HUMAN   | 3.547             | 16          | P06733      | ENO1      | ENSP00000234590     | m  |
| 1433E_HUMAN  | 3.530             | 16          | P62258      | YWHAE     | ENSP00000264335     | pr |
| K1C10_HUMAN  | 3.509             | 18          | P13645      | KRT10     | ENSP00000269576     | s  |
| TBA4A_HUMAN  | 3.476             | 16          | P68366      | TUBA4A    | ENSP00000248437     | s  |
| H2AY_HUMAN   | 3.438             | 18          | O75367      | H2AFY     | ENSP00000423563     | n  |
| PLCD1_HUMAN  | 3.415             | 16          | P51178      | PLCD1     | ENSP00000430344     | m  |
| AMPL_HUMAN   | 3.385             | 16          | P28838      | LAP3      | ENSP00000226299     | m  |
| GSTP1_HUMAN  | 3.383             | 17          | P09211      | GSTP1     | ENSP00000381607     | m  |
| K2C7_HUMAN   | 3.357             | 20          | P08729      | KRT7      | ENSP00000329243     | s  |

|             |       |    |        |            |                 |    |
|-------------|-------|----|--------|------------|-----------------|----|
| HSP7C_HUMAN | 3.321 | 16 | P11142 | HSPA8      | ENSP00000437125 | pr |
| PKP3_HUMAN  | 3.318 | 17 | Q9Y446 | PKP3       | ENSP00000331678 | s  |
| BLMH_HUMAN  | 3.302 | 16 | Q13867 | BLMH       | ENSP00000261714 | m  |
| GRP78_HUMAN | 3.265 | 16 | P11021 | HSPA5      | ENSP00000324173 | pr |
| MDHM_HUMAN  | 3.228 | 16 | P40926 | MDH2       | ENSP00000327070 | mt |
| FA26D_HUMAN | 3.218 | 16 | Q5JW98 | FAM26D     | ENSP00000357585 | pm |
| TBB2A_HUMAN | 3.175 | 16 | Q13885 | TUBB2A     | ENSP00000369703 | s  |
| ALDH2_HUMAN | 3.130 | 16 | P05091 | ALDH2      | ENSP00000261733 | mt |
| CTNB1_HUMAN | 3.067 | 16 | P35222 | CTNNB1     | ENSP00000385604 | pm |
| S10A3_HUMAN | 3.052 | 16 | P33764 | S10A3      | ENSP00000357702 | u  |
| EF1A1_HUMAN | 3.052 | 16 | P68104 | EEF1A1     | ENSP00000339063 | pr |
| VDAC2_HUMAN | 3.044 | 15 | P45880 | VDAC2      | ENSP00000298468 | pm |
| GPNMB_HUMAN | 3.043 | 16 | Q14956 | GPNMB      | ENSP00000258733 | pm |
| SPB5_HUMAN  | 3.005 | 15 | P36952 | SERPINB5   | ENSP00000372221 | ex |
| DHB4_HUMAN  | 2.944 | 16 | P51659 | HSD17B4    | ENSP00000256216 | m  |
| FABP4_HUMAN | 2.931 | 14 | P15090 | FABP4      | ENSP00000256104 | m  |
| CH60_HUMAN  | 2.931 | 16 | P10809 | HSPD1      | ENSP00000373620 | pr |
| RS27A_HUMAN | 2.900 | 16 | P62979 | RPS27A     | ENSP00000383981 | pr |
| PRDX6_HUMAN | 2.869 | 16 | P30041 | PRDX6      | ENSP00000342026 | m  |
| 1433Z_HUMAN | 2.838 | 15 | P63104 | YWHAZ      | ENSP00000379287 | pr |
| H2A2A_HUMAN | 2.806 | 14 | Q6FI13 | HIST2H2AA3 | ENSP00000358158 | n  |
| LMNA_HUMAN  | 2.797 | 15 | P02545 | LMNA       | ENSP00000357284 | n  |
| TPIS_HUMAN  | 2.766 | 15 | P60174 | TPI1       | ENSP00000229270 | m  |
| HCD2_HUMAN  | 2.748 | 15 | Q99714 | HSD17B10   | ENSP00000168216 | mt |
| K1C40_HUMAN | 2.737 | 15 | Q6A162 | KRT40      | ENSP00000381500 | s  |
| K2C6A_HUMAN | 2.730 | 16 | P02538 | KRT6A      | ENSP00000369317 | s  |
| KPYM_HUMAN  | 2.707 | 16 | P14618 | PKM        | ENSP00000455736 | m  |
| GDPD3_HUMAN | 2.646 | 14 | Q7L5L3 | GDPD3      | ENSP00000384363 | mb |
| UK114_HUMAN | 2.638 | 15 | P52758 | HRSP12     | ENSP00000254878 | pr |
| EF2_HUMAN   | 2.636 | 15 | P13639 | EEF2       | ENSP00000307940 | pr |
| K2C75_MOUSE | 2.620 | 15 | Q8BGZ7 | KRT75      | ENSP00000252245 | s  |
| ACTB_HUMAN  | 2.586 | 16 | P60709 | ACTB       | ENSP00000349960 | s  |
| H2B1J_HUMAN | 2.529 | 13 | P06899 | HIST1H2BJ  | ENSP00000342886 | n  |
| H15_HUMAN   | 2.514 | 14 | P16401 | HIST1H1B   | ENSP00000330074 | n  |
| KRT37_HUMAN | 2.431 | 15 | O76014 | KRT37      | ENSP00000225550 | s  |
| RLA2_HUMAN  | 2.420 | 13 | P05387 | RPLP2      | ENSP00000322419 | pr |
| RSSA_HUMAN  | 2.342 | 14 | P08865 | RPSA       | ENSP00000346067 | pr |
| K2C80_HUMAN | 2.301 | 14 | Q6KB66 | KRT80      | ENSP00000369361 | s  |
| LAMP1_HUMAN | 2.299 | 14 | P11279 | LAMP1      | ENSP00000333298 | l  |
| H2AZ_HUMAN  | 2.292 | 14 | P0C0S5 | H2AFZ      | ENSP00000296417 | n  |
| 1433B_HUMAN | 2.279 | 12 | P31946 | YWHAB      | ENSP00000300161 | pr |
| HSPB1_HUMAN | 2.255 | 14 | P04792 | HSPB1      | ENSP00000248553 | pr |
| VDAC1_HUMAN | 2.253 | 14 | P21796 | VDAC1      | ENSP00000265333 | mt |
| ROA1_HUMAN  | 2.247 | 15 | P09651 | HNRNPA1    | ENSP00000448617 | pr |
| K22E_HUMAN  | 2.234 | 12 | P35908 | KRT2       | ENSP00000310861 | s  |
| LDHB_HUMAN  | 2.201 | 12 | P07195 | LDHB       | ENSP00000379386 | m  |
| LMNB1_HUMAN | 2.144 | 14 | P20700 | LMNB1      | ENSP00000261366 | pm |

|              |       |    |        |           |                 |    |
|--------------|-------|----|--------|-----------|-----------------|----|
| TERA_HUMAN   | 2.108 | 14 | P55072 | VCP       | ENSP00000351777 | m  |
| TGM1_HUMAN   | 2.108 | 12 | P22735 | TGM1      | ENSP00000206765 | m  |
| COF1_HUMAN   | 2.088 | 11 | P23528 | CFL1      | ENSP00000432660 | s  |
| GGH_HUMAN    | 2.077 | 13 | Q92820 | GGH       | ENSP00000260118 | m  |
| H2B1B_HUMAN  | 2.076 | 12 | P33778 | HIST1H2BB | ENSP00000350580 | n  |
| H2AX_HUMAN   | 2.070 | 13 | P16104 | H2AFX     | ENSP00000364310 | n  |
| ACADV_HUMAN  | 2.058 | 14 | P49748 | ACADV     | ENSP00000349297 | mt |
| GFAP_HUMAN   | 2.058 | 13 | P14136 | GFAP      | ENSP00000253408 | s  |
| CALL5_HUMAN  | 2.035 | 13 | Q9NZT1 | CALML5    | ENSP00000369689 | pr |
| TBB4B_HUMAN  | 2.025 | 13 | P68371 | TUBB4B    | ENSP00000341289 | s  |
| H2A1_HUMAN   | 2.019 | 13 | POC0S8 | HIST1H2AK | ENSP00000330307 | n  |
| AIM1_HUMAN   | 2.005 | 14 | Q9Y4K1 | AIM1      | ENSP00000358062 | u  |
| K2C8_HUMAN   | 2.002 | 14 | P05787 | KRT8      | ENSP00000447566 | s  |
| HNRH1_HUMAN  | 1.987 | 14 | P31943 | HNRNPH1   | ENSP00000377082 | pr |
| LYG2_HUMAN   | 1.978 | 12 | Q86SG7 | LYG2      | ENSP00000386939 | ex |
| TRXR1_HUMAN  | 1.931 | 11 | Q16881 | TXNRD1    | ENSP00000434516 | m  |
| ECHA_HUMAN   | 1.922 | 13 | P40939 | HADHA     | ENSP00000370023 | mt |
| GDIB_HUMAN   | 1.916 | 11 | P50395 | GD12      | ENSP00000369538 | mb |
| H32_HUMAN    | 1.914 | 12 | Q71D13 | HIST2H3D  | ENSP00000333277 | n  |
| H14_MOUSE    | 1.913 | 14 | P43274 | HIST1H1E  | ENSP00000307705 | n  |
| CADH1_HUMAN  | 1.897 | 13 | P12830 | CDH1      | ENSP00000261769 | pm |
| PLD3_HUMAN   | 1.884 | 13 | Q8IV08 | PLD3      | ENSP00000386293 | m  |
| KRA31_HUMAN  | 1.864 | 10 | Q9BYR8 | KRTAP3-1  | ENSP00000375430 | s  |
| C9JSQ1_HUMAN | 1.863 | 12 | C9JSQ1 | CKMT1B    | ENSP00000413999 | mt |
| ANXA1_HUMAN  | 1.863 | 12 | P04083 | ANXA1     | ENSP00000257497 | pm |
| DSC3_HUMAN   | 1.860 | 12 | Q14574 | DSC3      | ENSP00000353608 | s  |
| KRA32_HUMAN  | 1.860 | 10 | Q9BYR7 | KRTAP3-2  | ENSP00000375429 | s  |
| PGK1_HUMAN   | 1.808 | 12 | P00558 | PGK1      | ENSP00000362413 | m  |
| MIF_HUMAN    | 1.793 | 12 | P14174 | MIF       | ENSP00000215754 | u  |
| CH10_HUMAN   | 1.791 | 11 | P61604 | HSPE1     | ENSP00000233893 | pr |
| S10AE_HUMAN  | 1.783 | 12 | Q9HCY8 | S100A14   | ENSP00000420296 | pr |
| CISY_HUMAN   | 1.773 | 12 | O75390 | CS        | ENSP00000342056 | mt |
| PHB_HUMAN    | 1.771 | 12 | P35232 | PHB       | ENSP00000300408 | mt |
| HS71L_HUMAN  | 1.769 | 12 | P34931 | HSPA1L    | ENSP00000364805 | pr |
| H2B1C_HUMAN  | 1.766 | 12 | P62807 | HIST1H2BE | ENSP00000348924 | n  |
| KR195_HUMAN  | 1.766 | 9  | Q3LI72 | KRTAP19-5 | ENSP00000334985 | s  |
| LDHA_HUMAN   | 1.734 | 11 | P00338 | LDHA      | ENSP00000395337 | m  |
| H12_HUMAN    | 1.722 | 12 | P16403 | HIST1H1C  | ENSP00000339566 | n  |
| PADI3_HUMAN  | 1.715 | 11 | Q9ULW8 | PADI3     | ENSP00000364609 | pr |
| 1433T_HUMAN  | 1.688 | 10 | P27348 | YWHAQ     | ENSP00000238081 | pr |
| NEUR2_HUMAN  | 1.686 | 11 | Q9Y3R4 | NEU2      | ENSP00000233840 | ex |
| ADT2_HUMAN   | 1.668 | 10 | P05141 | SLC25A5   | ENSP00000360671 | mt |
| ACTG_HUMAN   | 1.651 | 10 | P63261 | ACTG1     | ENSP00000331514 | s  |
| HEXB_HUMAN   | 1.648 | 10 | P07686 | HEXB      | ENSP00000261416 | m  |
| HS90A_HUMAN  | 1.644 | 11 | P07900 | HSP90AA1  | ENSP00000216281 | pr |
| KRA33_HUMAN  | 1.643 | 9  | Q9BYR6 | KRTAP3-3  | ENSP00000375428 | s  |
| H2B1N_HUMAN  | 1.632 | 9  | Q99877 | HIST1H2BN | ENSP00000380177 | n  |

|              |       |    |        |              |                 |    |
|--------------|-------|----|--------|--------------|-----------------|----|
| F16P1_HUMAN  | 1.625 | 10 | P09467 | FBP1         | ENSP00000364475 | m  |
| EF1G_HUMAN   | 1.582 | 9  | P26641 | EEF1G        | ENSP00000331901 | pr |
| ACTBL_HUMAN  | 1.581 | 12 | Q562R1 | ACTBL2       | ENSP00000416706 | s  |
| H2A3_HUMAN   | 1.560 | 12 | Q7L7L0 | HIST3H2A     | ENSP00000355656 | n  |
| K2C5_HUMAN   | 1.532 | 12 | P13647 | KRT5         | ENSP00000252242 | s  |
| KRA92_HUMAN  | 1.520 | 10 | Q9BYQ4 | KRTAP9-2     | ENSP00000366950 | s  |
| PABP1_HUMAN  | 1.518 | 11 | P11940 | PABPC1       | ENSP00000313007 | pr |
| Q5TEC6_HUMAN | 1.505 | 11 | Q5TEC6 | HIST2H3PS2   | ENSP00000376675 | n  |
| THIK_HUMAN   | 1.501 | 12 | P09110 | ACAA1        | ENSP00000333664 | m  |
| RL_HUMAN     | 1.470 | 10 | P05388 | RPLP0        | ENSP00000376299 | pr |
| ENASE_HUMAN  | 1.466 | 12 | Q8NFI3 | ENGASE       | ENSP00000438577 |    |
| H2A1H_HUMAN  | 1.460 | 11 | Q96KK5 | HIST1H2AH    | ENSP00000366679 | n  |
| PROF1_HUMAN  | 1.454 | 12 | P07737 | PFN1         | ENSP00000225655 | s  |
| B5MDD6_HUMAN | 1.417 | 8  | B5MDD6 | KRTAP9-9     | ENSP00000377576 | s  |
| K1C9_HUMAN   | 1.416 | 11 | P35527 | KRT9         | ENSP00000246662 | s  |
| TBB5_HUMAN   | 1.414 | 13 | P07437 | TUBB         | ENSP00000339001 | s  |
| H2A1D_HUMAN  | 1.400 | 11 | P20671 | HIST1H2AD    | ENSP00000341094 | n  |
| CLH1_HUMAN   | 1.392 | 9  | Q00610 | CLTC         | ENSP00000269122 | pm |
| KRA98_HUMAN  | 1.387 | 8  | Q9BYQ0 | KRTAP9-8     | ENSP00000254072 | s  |
| AATM_HUMAN   | 1.387 | 11 | P00505 | GOT2         | ENSP00000245206 | mt |
| RS3_HUMAN    | 1.387 | 11 | P23396 | RPS3         | ENSP00000434643 | pr |
| KRA93_HUMAN  | 1.373 | 8  | Q9BYQ3 | KRTAP9-3     | ENSP00000392189 | s  |
| KRA43_HUMAN  | 1.368 | 10 | Q9BYR4 | KRTAP4-3     | ENSP00000375151 | s  |
| LMNB2_HUMAN  | 1.357 | 10 | Q03252 | LMNB2        | ENSP00000327054 | n  |
| H2B2F_HUMAN  | 1.355 | 9  | Q5QNW6 | HIST2H2BF    | ENSP00000358164 | n  |
| TBA1A_HUMAN  | 1.352 | 11 | Q71U36 | TUBA1A       | ENSP00000301071 | s  |
| CRYAB_HUMAN  | 1.351 | 10 | P02511 | CRYAB        | ENSP00000436051 | pr |
| HSP76_HUMAN  | 1.325 | 11 | P17066 | HSPA6        | ENSP00000310219 | pr |
| ADT3_HUMAN   | 1.323 | 9  | P12236 | SLC25A6      | ENSP00000370808 | mt |
| SPB13_HUMAN  | 1.303 | 10 | Q9UIV8 | SERPINB13    | ENSP00000341584 | pr |
| FAHD1_HUMAN  | 1.301 | 10 | Q6P587 | FAHD1        | ENSP00000372114 | mt |
| KRA21_HUMAN  | 1.301 | 8  | Q9BYU5 | KRTAP2-1     | ENSP00000375238 | s  |
| PEBP1_HUMAN  | 1.293 | 12 | P30086 | PEBP1        | ENSP00000261313 | c  |
| KR111_HUMAN  | 1.287 | 9  | Q8IUC1 | KRTAP11-1    | ENSP00000330720 | s  |
| PHB2_HUMAN   | 1.287 | 10 | Q99623 | PHB2         | ENSP00000441875 | mb |
| THIO_HUMAN   | 1.284 | 12 | P10599 | TXN          | ENSP00000363641 | m  |
| H7C469_HUMAN | 1.283 | 10 | H7C469 | RP11-295K3.1 | ENSP00000415840 | u  |
| GSDMA_HUMAN  | 1.282 | 9  | Q96QA5 | GSDMA        | ENSP00000301659 | pm |
| EF1B_HUMAN   | 1.266 | 10 | P24534 | EEF1B2       | ENSP00000236957 | pr |
| FAS_HUMAN    | 1.238 | 8  | P49327 | FASN         | ENSP00000304592 | m  |
| PLEC_HUMAN}  | 1.234 | 11 | Q15149 | PLEC         | ENSP00000344848 | s  |
| SFPQ_HUMAN   | 1.232 | 10 | P23246 | SFPQ         | ENSP00000349748 | pr |
| H2A2C_HUMAN  | 1.232 | 9  | Q16777 | HIST2H2AC    | ENSP00000332194 | n  |
| TAGL2_HUMAN  | 1.223 | 11 | P37802 | TAGLN2       | ENSP00000357077 | s  |
| K2C79_HUMAN  | 1.222 | 10 | Q5XKE5 | KRT79        | ENSP00000328358 | s  |
| K1C14_HUMAN  | 1.211 | 10 | P02533 | KRT14        | ENSP00000167586 | s  |
| H10_HUMAN    | 1.200 | 9  | P07305 | H1FO         | ENSP00000344504 | n  |

|              |       |    |        |              |                 |    |
|--------------|-------|----|--------|--------------|-----------------|----|
| TRIM29_HUMAN | 1.194 | 10 | Q14134 | TRIM29       | ENSP00000343129 | s  |
| ARF1_HUMAN   | 1.185 | 8  | P84077 | ARF1         | ENSP00000272102 | mb |
| PEPL_HUMAN   | 1.170 | 10 | O60437 | PPL          | ENSP00000340510 | s  |
| ECHD1_HUMAN  | 1.157 | 8  | Q9NTX5 | ECHDC1       | ENSP00000401751 | m  |
| PPAP_HUMAN   | 1.152 | 9  | P15309 | ACPP         | ENSP00000337471 | m  |
| PRDX2_HUMAN  | 1.146 | 8  | P32119 | PRDX2        | ENSP00000301522 | m  |
| RTN4_HUMAN   | 1.143 | 10 | Q9NQC3 | RTN4         | ENSP00000337838 | mb |
| FABP5_HUMAN  | 1.138 | 11 | Q01469 | FABP5        | ENSP00000297258 | m  |
| ARL8B_HUMAN  | 1.125 | 11 | Q9NVJ2 | ARL8B        | ENSP00000256496 | mb |
| FIS1_HUMAN   | 1.121 | 12 | Q9Y3D6 | FIS1         | ENSP00000223136 | mt |
| S10AG_HUMAN  | 1.117 | 9  | Q96FQ6 | S100A16      | ENSP00000357693 | n  |
| TKT_HUMAN    | 1.110 | 8  | P29401 | TKT          | ENSP00000417773 | m  |
| 1433G_HUMAN  | 1.102 | 8  | P61981 | YWHAG        | ENSP00000306330 | pr |
| H2A1B_HUMAN  | 1.098 | 9  | P04908 | HIST1H2AB    | ENSP00000259791 | n  |
| CALM_HUMAN   | 1.095 | 9  | P62158 | CALM2        | ENSP00000272298 | pr |
| RLA1_HUMAN   | 1.083 | 9  | P05386 | RPLP1        | ENSP00000346037 | pr |
| UBB_HUMAN    | 1.078 | 8  | P0CG47 | UBB          | ENSP00000304697 | pr |
| ALDOA_HUMAN  | 1.066 | 8  | P04075 | ALDOA        | ENSP00000336927 | m  |
| H2A1C_HUMAN  | 1.064 | 9  | Q93077 | HIST1H2AC    | ENSP00000367022 | n  |
| LEG1_HUMAN   | 1.062 | 9  | P09382 | LGALS1       | ENSP00000215909 | ex |
| CTNA1_HUMAN  | 1.061 | 7  | P35221 | CTNNA1       | ENSP00000304669 | pm |
| HSP71_HUMAN  | 1.060 | 9  | P08107 | HSPA1A       | ENSP00000364802 | pr |
| ECHB_HUMAN   | 1.054 | 8  | P55084 | HADHB        | ENSP00000325136 | mt |
| H2B1L_HUMAN  | 1.039 | 8  | Q99880 | HIST1H2BL    | ENSP00000366618 | n  |
| PPCE_HUMAN   | 1.037 | 9  | P48147 | PREP         | ENSP00000358106 | pr |
| KR131_HUMAN  | 1.036 | 8  | Q8IUC0 | KRTAP13-1    | ENSP00000347635 | s  |
| GRP75_HUMAN  | 1.024 | 10 | P38646 | HSPA9        | ENSP00000297185 | pr |
| HXK1_HUMAN   | 1.019 | 10 | P19367 | HK1          | ENSP00000352398 | m  |
| PARK7_HUMAN  | 1.016 | 8  | Q99497 | PARK7        | ENSP00000340278 | m  |
| PDIA1_HUMAN  | 1.013 | 8  | P07237 | P4HB         | ENSP00000327801 | pr |
| CATA_HUMAN   | 1.003 | 9  | P04040 | CAT          | ENSP00000241052 | m  |
| E9PRY8_HUMAN | 0.998 | 9  | E9PRY8 | EEF1D        | ENSP00000434070 | pr |
| IF4A1_HUMAN  | 0.993 | 7  | P60842 | EIF4A1       | ENSP00000293831 | pr |
| G6PI_HUMAN   | 0.982 | 7  | P06744 | GPI          | ENSP00000348877 | m  |
| K1C19_HUMAN  | 0.980 | 8  | P08727 | KRT19        | ENSP00000355124 | s  |
| RAB7A_HUMAN  | 0.974 | 9  | P51149 | RAB7A        | ENSP00000265062 | mb |
| KRA47_HUMAN  | 0.974 | 6  | Q9BYR0 | KRTAP4-7     | ENSP00000375236 | s  |
| CAN12_HUMAN  | 0.971 | 10 | Q6ZSI9 | CAPN12       | ENSP00000331636 | pr |
| LAMP2_HUMAN  | 0.965 | 8  | P13473 | LAMP2        | ENSP00000408411 | l  |
| S10AB_HUMAN  | 0.962 | 10 | P31949 | S100A11      | ENSP00000271638 | n  |
| RS2_HUMAN    | 0.959 | 7  | P15880 | RPS2         | ENSP00000341885 | pr |
| C1QBP_HUMAN  | 0.958 | 9  | Q07021 | C1QBP        | ENSP00000225698 | ex |
| APOD_HUMAN   | 0.957 | 9  | P05090 | APOD         | ENSP00000345179 | ex |
| C9JIT5_HUMAN | 0.949 | 9  | C9JIT5 | ATP5J2-PTCD1 | ENSP00000416954 | u  |
| K1C16_HUMAN  | 0.937 | 8  | P08779 | KRT16        | ENSP00000301653 | s  |
| SERA_HUMAN   | 0.936 | 8  | O43175 | PHGDH        | ENSP00000358417 | m  |
| COMT_HUMAN   | 0.934 | 9  | P21964 | COMT         | ENSP00000354511 | m  |

|              |       |          |           |                 |    |
|--------------|-------|----------|-----------|-----------------|----|
| KRA44_HUMAN  | 0.916 | 6 Q9BYR3 | KRTAP4-4  | ENSP00000375076 | s  |
| RAN_HUMAN    | 0.912 | 8 P62826 | RAN       | ENSP00000446215 | mb |
| KRA97_HUMAN  | 0.911 | 6 A8MTY7 | KRTAP9-7  | ENSP00000375149 | s  |
| PLP2_HUMAN   | 0.889 | 9 Q04941 | PLP2      | ENSP00000365505 | pm |
| HS90B_HUMAN  | 0.888 | 9 P08238 | HSP90AB1  | ENSP00000360709 | pr |
| AHNK_HUMAN   | 0.888 | 9 Q09666 | AHNAK     | ENSP00000367263 | u  |
| K2C1B_HUMAN  | 0.879 | 8 Q7Z794 | KRT77     | ENSP00000342710 | s  |
| MBOA5_HUMAN  | 0.872 | 8 Q6P1A2 | LPCAT3    | ENSP00000261407 | m  |
| H2B3B_HUMAN  | 0.866 | 7 Q8N257 | HIST3H2BB | ENSP00000375736 | n  |
| EFHD1_HUMAN  | 0.865 | 7 Q9BUP0 | EFHD1     | ENSP00000264059 | mt |
| H4_HUMAN     | 0.852 | 7 P62805 |           |                 | n  |
| IMB1_HUMAN   | 0.852 | 8 Q14974 | KPNB1     | ENSP00000290158 | n  |
| KRA46_HUMAN  | 0.812 | 5 Q9BYQ5 | KRTAP4-6  | ENSP00000328270 | s  |
| KR411_HUMAN  | 0.810 | 5 Q9BYQ6 | KRTAP4-11 | ENSP00000375232 | s  |
| KR412_HUMAN  | 0.810 | 5 Q9BQ66 | KRTAP4-12 | ENSP00000377582 | s  |
| KRA49_HUMAN  | 0.806 | 5 Q9BYQ8 | KRTAP4-9  | ENSP00000375234 | s  |
| NPC1_HUMAN   | 0.805 | 8 O15118 | NPC1      | ENSP00000269228 | l  |
| F5H608_HUMAN | 0.804 | 6 F5H608 | ATP5H     | ENSP00000437996 | mt |
| KRA45_HUMAN  | 0.804 | 5 Q9BYR2 | KRTAP4-5  | ENSP00000340546 | s  |
| CUX2_HUMAN   | 0.797 | 8 O14529 | CUX2      | ENSP00000261726 | n  |
| VDAC3_HUMAN  | 0.796 | 7 Q9Y277 | VDAC3     | ENSP00000428845 | mt |
| KRA81_HUMAN  | 0.793 | 6 Q8IUC2 | KRTAP8-1  | ENSP00000332805 | s  |
| SYG_HUMAN    | 0.791 | 5 P41250 |           |                 | pr |
| H33_HUMAN    | 0.780 | 6 P84243 | H3F3A     | ENSP00000355781 | n  |
| CLIC1_HUMAN  | 0.780 | 7 O00299 | CLIC1     | ENSP00000364940 | pm |
| IDH3A_HUMAN  | 0.776 | 8 P50213 | IDH3A     | ENSP00000299518 | mt |
| PDIA6_HUMAN  | 0.771 | 5 Q15084 |           |                 | pr |
| RDHE2_HUMAN  | 0.762 | 7 Q8N3Y7 | SDR16C5   | ENSP00000307607 | m  |
| KRA42_HUMAN  | 0.760 | 5 Q9BYR5 | KRTAP4-2  | ENSP00000366955 | s  |
| RAB1B_HUMAN  | 0.747 | 7 Q9H0U4 | RAB1B     | ENSP00000310226 | mb |
| VIME_HUMAN   | 0.724 | 5 P08670 | VIM       | ENSP00000224237 | s  |
| CATD_HUMAN   | 0.722 | 8 P07339 | CTSD      | ENSP00000236671 | ml |
| RAB10_HUMAN  | 0.719 | 7 P61026 | RAB10     | ENSP00000264710 | mb |
| PIIB_HUMAN   | 0.717 | 7 P23284 | PIIB      | ENSP00000300026 | pr |
| ACTN1_HUMAN  | 0.710 | 6 P12814 | ACTN1     | ENSP00000193403 | s  |
| K1C13_HUMAN  | 0.710 | 7 P13646 | KRT13     | ENSP00000246635 | s  |
| CYTB_HUMAN   | 0.703 | 5 P04080 | CSTB      | ENSP00000291568 | pr |
| SODC_HUMAN   | 0.700 | 7 P00441 | SOD1      | ENSP00000270142 | m  |
| GRAP1_HUMAN  | 0.697 | 5 Q4V328 | GRIPAP1   | ENSP00000365608 | mb |
| ENPL_HUMAN   | 0.695 | 7 P14625 | HSP90B1   | ENSP00000299767 | pr |
| LYPA1_HUMAN  | 0.695 | 7 O75608 | LYPLA1    | ENSP00000320043 | m  |
| SSBP_HUMAN   | 0.682 | 7 Q04837 | SSBP1     | ENSP00000265304 | mt |
| KR132_HUMAN  | 0.674 | 6 Q52LG2 |           |                 | s  |
| K1C24_HUMAN  | 0.674 | 7 Q2M2I5 | KRT24     | ENSP00000264651 | s  |
| ROA3_HUMAN   | 0.670 | 6 P51991 | HNRNPA3   | ENSP00000376309 | n  |
| QCR2_HUMAN   | 0.666 | 6 P22695 | UQCRC2    | ENSP00000268379 | mt |
| COX2_HUMAN   | 0.666 | 8 P00403 | MT-CO2    | ENSP00000354876 | mt |

|              |       |          |            |                 |    |
|--------------|-------|----------|------------|-----------------|----|
|              | 0.665 | 7 P62701 | RPS4X      | ENSP00000362744 | pr |
| CPT1A_HUMAN  | 0.664 | 7 P50416 | CPT1A      | ENSP00000439084 | mt |
| IF4A2_HUMAN  | 0.659 | 7 Q14240 | EIF4A2     | ENSP00000326381 | pr |
| RL11_HUMAN   | 0.657 | 7 P62913 | RPL11      | ENSP00000363676 | pr |
| ECHM_HUMAN   | 0.655 | 6 P30084 | ECHS1      | ENSP00000357535 | mt |
| ACTS_HUMAN   | 0.650 | 6 P68133 | ACTA1      | ENSP00000355645 | s  |
| SCFD1_HUMAN  | 0.648 | 7 Q8WVM8 | SCFD1      | ENSP00000390783 | mb |
| DEST_HUMAN   | 0.640 | 7 P60981 | DSTN       | ENSP00000246069 | s  |
| MPCP_HUMAN   | 0.638 | 5 Q00325 | SLC25A3    | ENSP00000383898 | mt |
| HNRPC_HUMAN  | 0.637 | 6 P07910 | HNRNPC     | ENSP00000338095 | pr |
| PGAM1_HUMAN  | 0.632 | 4 P18669 | PGAM1      | ENSP00000359991 | m  |
| H2AW_HUMAN   | 0.631 | 6 Q9P0M6 | H2AFY2     | ENSP00000362352 | n  |
| KR161_HUMAN  | 0.627 | 5 A8MUX0 | KRTAP16-1  | ENSP00000375147 | s  |
| FUMH_HUMAN   | 0.623 | 6 P07954 | FH         | ENSP00000355518 | mt |
| NONO_HUMAN   | 0.621 | 7 Q15233 | NONO       | ENSP00000276079 | n  |
| KR10B_HUMAN  | 0.621 | 5 P60412 | KRTAP10-11 | ENSP00000334197 | s  |
| BACH_HUMAN   | 0.614 | 7 O00154 | ACOT7      | ENSP00000367086 | m  |
| ACBP_HUMAN   | 0.613 | 7 P07108 | DBI        | ENSP00000348116 | mb |
| RL13A_HUMAN  | 0.610 | 6 P40429 | RPL13A     | ENSP00000375730 | pr |
| QCR1_HUMAN   | 0.596 | 5 P31930 | UQCRC1     | ENSP00000203407 | pr |
| ROA2_HUMAN   | 0.594 | 6 P22626 | HNRNPA2B1  | ENSP00000346694 | pr |
| RINI_HUMAN   | 0.588 | 6 P13489 | RNH1       | ENSP00000433999 | pr |
| CXAR_HUMAN   | 0.582 | 6 P78310 | CXADR      | ENSP00000284878 | pm |
| RL6_HUMAN    | 0.581 | 6 Q02878 | RPL6       | ENSP00000202773 | pr |
| Q32Q12_HUMAN | 0.580 | 4 Q32Q12 | NME1-NME2  | ENSP00000451932 | m  |
| THIM_HUMAN   | 0.578 | 4 P42765 | ACAA2      | ENSP00000285093 | mt |
| H2A2B_HUMAN  | 0.575 | 4        |            | Q8IUE6          | n  |
| H13_HUMAN    | 0.571 | 5 P16402 | HIST1H1D   | ENSP00000244534 | n  |
| PERI_HUMAN   | 0.569 | 4 P41219 | PRPH       | ENSP00000257860 | s  |
| DNLS2_HUMAN  | 0.569 | 5 Q92874 | DNASE1L2   | ENSP00000454562 | n  |
| ERH_HUMAN    | 0.568 | 6 P84090 | ERH        | ENSP00000451080 | u  |
| VATB2_HUMAN  | 0.562 | 5 P21281 | ATP6V1B2   | ENSP00000276390 | mb |
| G6PD_HUMAN   | 0.557 | 7 P11413 | G6PD       | ENSP00000377192 | m  |
| Q5T8U2_HUMAN | 0.556 | 6 Q5T8U2 | RPL7A      | ENSP00000361071 | pr |
| VATA_HUMAN   | 0.552 | 6 P38606 | ATP6V1A    | ENSP00000273398 | pm |
| ATPO_HUMAN   | 0.551 | 5 P48047 | ATP5O      | ENSP00000290299 | mt |
| RL12_HUMAN   | 0.547 | 5 P30050 |            |                 | pr |
| KC1D_HUMAN   | 0.547 | 5 P48730 | CSNK1D     | ENSP00000324464 | pr |
| RS3A_HUMAN   | 0.546 | 6 P61247 | RPS3A      | ENSP00000346050 | pr |
| 6PGL_HUMAN   | 0.534 | 5 O95336 | PGLS       | ENSP00000252603 | m  |
| DNJB6_HUMAN  | 0.530 | 5        |            |                 | s  |
| RB11A_HUMAN  | 0.530 | 4 P62491 | RAB11A     | ENSP00000261890 | mb |
| RS24_HUMAN   | 0.527 | 5 P62847 | RPS24      | ENSP00000361435 | pr |
| PGAM2_HUMAN  | 0.523 | 5 P15259 |            |                 | m  |
| D6RHH4_HUMAN | 0.522 | 5 D6RHH4 | GNB2L1     | ENSP00000426101 | mb |
| EPCR_HUMAN   | 0.521 | 4 Q9UNN8 | PROCR      | ENSP00000363601 | pm |
| ENOG_HUMAN   | 0.520 | 4        |            |                 | m  |

|              |       |   |        |             |                 |    |
|--------------|-------|---|--------|-------------|-----------------|----|
| EFTU_HUMAN   | 0.519 | 6 | P49411 | TUFM        | ENSP00000322439 | pr |
| RAB14_HUMAN  | 0.515 | 5 | P61106 | RAB14       | ENSP00000362946 | mb |
| RTN3_HUMAN   | 0.512 | 4 | O95197 | RTN3        | ENSP00000367050 | pr |
| DLDH_HUMAN   | 0.509 | 5 | P09622 | DLD         | ENSP00000205402 | mt |
| SRSF3_HUMAN  | 0.504 | 5 | P84103 | SRSF3       | ENSP00000362820 | pr |
| KIF5A_HUMAN  | 0.494 | 6 | Q12840 | KIF5A       | ENSP00000408979 | s  |
| GBG12_HUMAN  | 0.491 | 5 | Q9UBI6 | GNG12       | ENSP00000360021 | pm |
| GLCM_HUMAN   | 0.487 | 4 | P04062 | GBA         | ENSP00000357357 | m  |
| TBB4A_HUMAN  | 0.485 | 6 | P04350 | TUBB4A      | ENSP00000264071 | s  |
| IF2GL_HUMAN  | 0.484 | 6 | Q2VIR3 | EIF2S3L     | ENSP00000323063 | pr |
| EPT1_HUMAN   | 0.483 | 5 | Q9C0D9 | EPT1        | ENSP00000260585 | m  |
| PITH1_HUMAN  | 0.480 | 6 | Q9GZP4 | PITHD1      | ENSP00000246151 | u  |
| ECH1_HUMAN   | 0.479 | 6 | Q13011 | ECH1        | ENSP00000221418 | m  |
| POTEF_HUMAN  | 0.478 | 5 | A5A3E0 | POTEF       | ENSP00000386786 | s  |
| CLIC3_HUMAN  | 0.471 | 5 | O95833 | CLIC3       | ENSP00000419378 | mb |
| ODO2_HUMAN   | 0.469 | 5 | P36957 | DLST        | ENSP00000335304 | u  |
| A8MUD9_HUMAN | 0.469 | 4 | A8MUD9 | RPL7        | ENSP00000379731 | pr |
| CACP_HUMAN   | 0.463 | 5 | P43155 | CRAT        | ENSP00000315013 | m  |
| MDHC_HUMAN   | 0.462 | 5 | P40925 | MDH1        | ENSP00000233114 | m  |
| C9J406_HUMAN | 0.461 | 5 | C9J406 | IMMT        | ENSP00000254636 | mt |
| GGCT_HUMAN   | 0.460 | 5 | O75223 | GGCT        | ENSP00000275428 | m  |
| NDKA_HUMAN   | 0.459 | 5 | P15531 | NME1        | ENSP00000376892 | m  |
| CDC42_HUMAN  | 0.452 | 5 | P60953 | CDC42       | ENSP00000341072 | s  |
| H7C0C1_HUMAN | 0.451 | 7 | H7C0C1 | AP000304.12 | ENSP00000394107 | u  |
| S10AA_HUMAN  | 0.447 | 5 | P60903 | S100A10     | ENSP00000357801 | pm |
| GAN_HUMAN    | 0.444 | 5 | Q9H2C0 | GAN         | ENSP00000248272 | s  |
| H11_HUMAN    | 0.435 | 5 | Q02539 | HIST1H1A    | ENSP00000244573 | n  |
| RS26_HUMAN   | 0.433 | 4 | P62854 | RPS26       | ENSP00000348849 | pr |
| HNRPD_HUMAN  | 0.429 | 6 | Q14103 | HNRNPD      | ENSP00000313199 | pr |
| RL18_HUMAN   | 0.428 | 4 | Q07020 | RPL18       | ENSP00000447001 | pr |
| PDIA3_HUMAN  | 0.424 | 4 | P30101 | PDIA3       | ENSP00000300289 | pr |
| C9JRH2_HUMAN | 0.420 | 6 | C9JRH2 | RCC1        | ENSP00000402740 | n  |
| TMEDA_HUMAN  | 0.419 | 4 | P49755 | TMED10      | ENSP00000303145 | pm |
| POTEI_HUMAN  | 0.417 | 4 | P0CG38 | POTEI       | ENSP00000392718 | s  |
| K2C73_HUMAN  | 0.415 | 5 | Q86Y46 | KRT73       | ENSP00000307014 | s  |
| BAF_HUMAN    | 0.407 | 6 | O75531 | BANF1       | ENSP00000310275 | n  |
| K22O_HUMAN   | 0.406 | 4 | Q01546 | KRT76       | ENSP00000330101 | s  |
| NACA_HUMAN   | 0.401 | 4 | Q13765 | NACA        | ENSP00000403817 | pr |
| MYCBP_HUMAN  | 0.401 | 5 | Q99417 | MYCBP       | ENSP00000380702 | n  |
| H3BTZ8_HUMAN | 0.399 | 4 | H3BTZ8 | CIAPIN1     | ENSP00000457400 | m  |
| ATPD_HUMAN   | 0.399 | 5 | P30049 | ATP5D       | ENSP00000215375 | mt |
| CNBP1_HUMAN  | 0.395 | 4 | Q9NSA3 | CTNNBIP1    | ENSP00000366474 | pm |
| KR261_HUMAN  | 0.389 | 4 | Q6PEX3 |             |                 | s  |
| H31T_HUMAN   | 0.388 | 5 | Q16695 | HIST3H3     | ENSP00000355657 | n  |
| GDIR1_HUMAN  | 0.384 | 4 | P52565 | ARHGDI1     | ENSP00000269321 | mb |
| ARF5_HUMAN   | 0.369 | 4 | P84085 | ARF5        | ENSP00000000233 | mb |
| PO210_HUMAN  | 0.367 | 5 | Q8TEM1 | NUP210      | ENSP00000254508 | n  |



|              |       |          |         |                 |  |    |
|--------------|-------|----------|---------|-----------------|--|----|
| ILVBL_HUMAN  | 0.367 | 4 A1L0T0 |         |                 |  | m  |
| LX15B_HUMAN  | 0.364 | 4 O15296 | ALOX15B | ENSP00000369530 |  | m  |
| FA83H_HUMAN  | 0.363 | 4 Q6ZRV2 |         |                 |  | s  |
| RS16_HUMAN   | 0.360 | 4 P62249 | RPS16   | ENSP00000251453 |  | pr |
| ASSY_HUMAN   | 0.359 | 4 P00966 | ASS1    | ENSP00000253004 |  | m  |
| PLB1_HUMAN   | 0.355 | 4 Q6P1J6 |         |                 |  | mb |
| RL23_HUMAN   | 0.348 | 5 P62829 | RPL23   | ENSP00000420311 |  | pr |
| K1C15_HUMAN  | 0.347 | 4 P19012 | KRT15   | ENSP00000254043 |  | s  |
| APT_HUMAN    | 0.341 | 4 P07741 | APRT    | ENSP00000367615 |  | m  |
| ATPG_HUMAN   | 0.339 | 4 P36542 | ATP5C1  | ENSP00000349142 |  | mt |
| TACD2_HUMAN  | 0.332 | 4 P09758 | TACSTD2 | ENSP00000360269 |  | pm |
| RL22_HUMAN   | 0.331 | 4 P35268 | RPL22   | ENSP00000346088 |  | pr |
| MTCH2_HUMAN  | 0.330 | 4 Q9Y6C9 | MTCH2   | ENSP00000303222 |  | mt |
| 6PGD_HUMAN   | 0.324 | 4 P52209 | PGD     | ENSP00000270776 |  | m  |
| K2C4_HUMAN   | 0.321 | 4 P19013 |         |                 |  | s  |
| F6XWZ1_HUMAN | 0.318 | 4 F6XWZ1 | LY6G6D  | ENSP00000364984 |  | u  |
| ACOX3_HUMAN  | 0.315 | 4 O15254 | ACOX3   | ENSP00000413994 |  | m  |
| CO1A1_HUMAN  | 0.306 | 4 P02452 | COL1A1  | ENSP00000225964 |  | ex |
| RS6_HUMAN    | 0.299 | 4 P62753 |         |                 |  | pr |
| K2C72_HUMAN  | 0.296 | 4 Q14CN4 | KRT72   | ENSP00000441160 |  | s  |
| CTND1_HUMAN  | 0.283 | 4 O60716 | CTNND1  | ENSP00000436543 |  | pm |
| AAAT_HUMAN   | 0.278 | 4 Q15758 | SLC1A5  | ENSP00000303623 |  | pm |
| EZRI_HUMAN   | 0.268 | 4 P15311 | EZR     | ENSP00000338934 |  | s  |
| RS8_HUMAN    | 0.263 | 4 P62241 | RPS8    | ENSP00000379888 |  | pr |
| D6RAJ2_HUMAN | 0.253 | 4 D6RAJ2 | SLC27A6 | ENSP00000421759 |  | m  |
