# Supplementary material for: Demonstration of Protein-Based Human Identification Using the Hair Shaft Proteome
Source: PubMed Central journal article supplement (PMC5014411; doi:10.1371/journal.pone.0160653), 2016-09-07
Supplement: pone.0160653.s007.pdf [file pone.0160653.s007.pdf]

| L1.051.1C | L1.052.1C | L1.053.1C | L1.054.1C | L1.055.2C | L1.056.2C | L1.057.1C | L1.058.1C | L1.059.1C | L1.060.1C | STD 654 | STD 666 | STD 936 | STD 962 | STD 949 | STD 1246 | STD 1247 | STD 1253 | STD 1267 | STD 1279 | STD 1303 | STD 1761 | STD 988 | STD 995 | STD 975 | STD summed |
|-----------|-----------|-----------|-----------|-----------|-----------|-----------|-----------|-----------|-----------|---------|---------|---------|---------|---------|----------|----------|----------|----------|----------|----------|----------|---------|---------|---------|------------|
| 1         | 1         |           |           |           |           |           | 1         |           |           |         |         |         |         |         |          |          |          |          |          |          |          |         |         |         |            |
|           |           |           |           |           |           |           | 1         |           |           |         |         |         |         |         |          |          |          |          |          |          |          |         |         |         |            |
|           |           |           |           |           |           |           | 1         |           |           |         |         |         |         |         |          |          |          |          |          |          |          |         |         |         |            |
|           |           |           |           |           |           |           | 1         |           |           |         |         |         |         |         |          |          |          |          |          |          |          |         |         |         |            |
|           |           |           |           |           |           |           | 1         |           |           |         |         |         |         |         |          |          |          |          |          |          |          |         |         |         |            |
|           |           |           |           |           |           |           | 1         |           |           |         |         |         |         |         |          |          |          |          |          |          |          |         |         |         |            |
|           |           |           |           |           |           |           | 1         |           |           |         |         |         |         |         |          |          |          |          |          |          |          |         |         |         |            |
|           |           |           |           |           |           |           | 1         |           |           |         |         |         |         |         |          |          |          |          |          |          |          |         |         |         |            |
|           |           |           |           |           |           |           | 1         |           |           |         |         |         |         |         |          |          |          |          |          |          |          |         |         |         |            |
|           |           |           |           |           |           |           | 1         |           |           |         |         |         |         |         |          |          |          |          |          |          |          |         |         |         |            |
|           |           |           |           |           |           |           | 1         |           |           |         |         |         |         |         |          |          |          |          |          |          |          |         |         |         |            |
|           |           |           |           |           |           |           | 1         |           |           |         |         |         |         |         |          |          |          |          |          |          |          |         |         |         |            |
|           |           |           |           |           |           |           | 1         |           |           |         |         |         |         |         |          |          |          |          |          |          |          |         |         |         |            |
|           |           |           |           |           |           |           | 1         |           |           |         |         |         |         |         |          |          |          |          |          |          |          |         |         |         |            |
|           |           |           |           |           |           |           | 1         |           |           |         |         |         |         |         |          |          |          |          |          |          |          |         |         |         |            |
|           |           |           |           |           |           |           | 1         |           |           |         |         |         |         |         |          |          |          |          |          |          |          |         |         |         |            |
|           |           |           |           |           |           |           | 1         |           |           |         |         |         |         |         |          |          |          |          |          |          |          |         |         |         |            |
|           |           |           |           |           |           |           | 1         |           |           |         |         |         |         |         |          |          |          |          |          |          |          |         |         |         |            |
|           |           |           |           |           |           |           | 1         |           |           |         |         |         |         |         |          |          |          |          |          |          |          |         |         |         |            |
|           |           |           |           |           |           |           | 1         |           |           |         |         |         |         |         |          |          |          |          |          |          |          |         |         |         |            |
|           |           |           |           |           |           |           | 1         |           |           |         |         |         |         |         |          |          |          |          |          |          |          |         |         |         |            |
|           |           |           |           |           |           |           | 1         |           |           |         |         |         |         |         |          |          |          |          |          |          |          |         |         |         |            |
|           |           |           |           |           |           |           | 1         |           |           |         |         |         |         |         |          |          |          |          |          |          |          |         |         |         |            |
|           |           |           |           |           |           |           | 1         |           |           |         |         |         |         |         |          |          |          |          |          |          |          |         |         |         |            |
|           |           |           |           |           |           |           | 1         |           |           |         |         |         |         |         |          |          |          |          |          |          |          |         |         |         |            |
|           |           |           |           |           |           |           | 1         |           |           |         |         |         |         |         |          |          |          |          |          |          |          |         |         |         |            |
|           |           |           |           |           |           |           | 1         |           |           |         |         |         |         |         |          |          |          |          |          |          |          |         |         |         |            |
|           |           |           |           |           |           |           | 1         |           |           |         |         |         |         |         |          |          |          |          |          |          |          |         |         |         |            |
|           |           |           |           |           |           |           | 1         |           |           |         |         |         |         |         |          |          |          |          |          |          |          |         |         |         |            |
|           |           |           |           |           |           |           | 1         |           |           |         |         |         |         |         |          |          |          |          |          |          |          |         |         |         |            |
|           |           |           |           |           |           |           | 1         |           |           |         |         |         |         |         |          |          |          |          |          |          |          |         |         |         |            |
|           |           |           |           |           |           |           | 1         |           |           |         |         |         |         |         |          |          |          |          |          |          |          |         |         |         |            |
|           |           |           |           |           |           |           | 1         |           |           |         |         |         |         |         |          |          |          |          |          |          |          |         |         |         |            |
|           |           |           |           |           |           |           | 1         |           |           |         |         |         |         |         |          |          |          |          |          |          |          |         |         |         |            |
|           |           |           |           |           |           |           | 1         |           |           |         |         |         |         |         |          |          |          |          |          |          |          |         |         |         |            |
|           |           |           |           |           |           |           | 1         |           |           |         |         |         |         |         |          |          |          |          |          |          |          |         |         |         |            |
|           |           |           |           |           |           |           | 1         |           |           |         |         |         |         |         |          |          |          |          |          |          |          |         |         |         |            |
|           |           |           |           |           |           |           | 1         |           |           |         |         |         |         |         |          |          |          |          |          |          |          |         |         |         |            |
|           |           |           |           |           |           |           | 1         |           |           |         |         |         |         |         |          |          |          |          |          |          |          |         |         |         |            |
|           |           |           |           |           |           |           | 1         |           |           |         |         |         |         |         |          |          |          |          |          |          |          |         |         |         |            |
|           |           |           |           |           |           |           | 1         |           |           |         |         |         |         |         |          |          |          |          |          |          |          |         |         |         |            |
|           |           |           |           |           |           |           | 1         |           |           |         |         |         |         |         |          |          |          |          |          |          |          |         |         |         |            |
|           |           |           |           |           |           |           | 1         |           |           |         |         |         |         |         |          |          |          |          |          |          |          |         |         |         |            |
|           |           |           |           |           |           |           | 1         |           |           |         |         |         |         |         |          |          |          |          |          |          |          |         |         |         |            |
|           |           |           |           |           |           |           | 1         |           |           |         |         |         |         |         |          |          |          |          |          |          |          |         |         |         |            |
|           |           |           |           |           |           |           | 1         |           |           |         |         |         |         |         |          |          |          |          |          |          |          |         |         |         |            |
|           |           |           |           |           |           |           | 1         |           |           |         |         |         |         |         |          |          |          |          |          |          |          |         |         |         |            |
|           |           |           |           |           |           |           | 1         |           |           |         |         |         |         |         |          |          |          |          |          |          |          |         |         |         |            |
|           |           |           |           |           |           |           | 1         |           |           |         |         |         |         |         |          |          |          |          |          |          |          |         |         |         |            |
|           |           |           |           |           |           |           | 1         |           |           |         |         |         |         |         |          |          |          |          |          |          |          |         |         |         |            |
|           |           |           |           |           |           |           | 1         |           |           |         |         |         |         |         |          |          |          |          |          |          |          |         |         |         |            |
|           |           |           |           |           |           |           | 1         |           |           |         |         |         |         |         |          |          |          |          |          |          |          |         |         |         |            |
|           |           |           |           |           |           |           | 1         |           |           |         |         |         |         |         |          |          |          |          |          |          |          |         |         |         |            |
|           |           |           |           |           |           |           | 1         |           |           |         |         |         |         |         |          |          |          |          |          |          |          |         |         |         |            |
|           |           |           |           |           |           |           | 1         |           |           |         |         |         |         |         |          |          |          |          |          |          |          |         |         |         |            |
|           |           |           |           |           |           |           | 1         |           |           |         |         |         |         |         |          |          |          |          |          |          |          |         |         |         |            |
|           |           |           |           |           |           |           | 1         |           |           |         |         |         |         |         |          |          |          |          |          |          |          |         |         |         |            |
|           |           |           |           |           |           |           | 1         |           |           |         |         |         |         |         |          |          |          |          |          |          |          |         |         |         |            |
|           |           |           |           |           |           |           | 1         |           |           |         |         |         |         |         |          |          |          |          |          |          |          |         |         |         |            |
|           |           |           |           |           |           |           | 1         |           |           |         |         |         |         |         |          |          |          |          |          |          |          |         |         |         |            |
|           |           |           |           |           |           |           | 1         |           |           |         |         |         |         |         |          |          |          |          |          |          |          |         |         |         |            |
|           |           |           |           |           |           |           | 1         |           |           |         |         |         |         |         |          |          |          |          |          |          |          |         |         |         |            |
|           |           |           |           |           |           |           | 1         |           |           |         |         |         |         |         |          |          |          |          |          |          |          |         |         |         |            |
|           |           |           |           |           |           |           | 1         |           |           |         |         |         |         |         |          |          |          |          |          |          |          |         |         |         |            |
|           |           |           |           |           |           |           | 1         |           |           |         |         |         |         |         |          |          |          |          |          |          |          |         |         |         |            |
|           |           |           |           |           |           |           | 1         |           |           |         |         |         |         |         |          |          |          |          |          |          |          |         |         |         |            |
|           |           |           |           |           |           |           | 1         |           |           |         |         |         |         |         |          |          |          |          |          |          |          |         |         |         |            |
|           |           |           |           |           |           |           | 1         |           |           |         |         |         |         |         |          |          |          |          |          |          |          |         |         |         |            |
|           |           |           |           |           |           |           | 1         |           |           |         |         |         |         |         |          |          |          |          |          |          |          |         |         |         |            |
|           |           |           |           |           |           |           | 1         |           |           |         |         |         |         |         |          |          |          |          |          |          |          |         |         |         |            |
|           |           |           |           |           |           |           | 1         |           |           |         |         |         |         |         |          |          |          |          |          |          |          |         |         |         |            |
|           |           |           |           |           |           |           | 1         |           |           |         |         |         |         |         |          |          |          |          |          |          |          |         |         |         |            |
|           |           |           |           |           |           |           | 1         |           |           |         |         |         |         |         |          |          |          |          |          |          |          |         |         |         |            |
|           |           |           |           |           |           |           | 1         |           |           |         |         |         |         |         |          |          |          |          |          |          |          |         |         |         |            |
|           |           |           |           |           |           |           | 1         |           |           |         |         |         |         |         |          |          |          |          |          |          |          |         |         |         |            |
|           |           |           |           |           |           |           | 1         |           |           |         |         |         |         |         |          |          |          |          |          |          |          |         |         |         |            |
|           |           |           |           |           |           |           | 1         |           |           |         |         |         |         |         |          |          |          |          |          |          |          |         |         |         |            |
|           |           |           |           |           |           |           | 1         |           |           |         |         |         |         |         |          |          |          |          |          |          |          |         |         |         |            |
|           |           |           |           |           |           |           | 1         |           |           |         |         |         |         |         |          |          |          |          |          |          |          |         |         |         |            |
|           |           |           |           |           |           |           | 1         |           |           |         |         |         |         |         |          |          |          |          |          |          |          |         |         |         |            |
|           |           |           |           |           |           |           | 1         |           |           |         |         |         |         |         |          |          |          |          |          |          |          |         |         |         |            |
|           |           |           |           |           |           |           | 1         |           |           |         |         |         |         |         |          |          |          |          |          |          |          |         |         |         |            |
|           |           |           |           |           |           |           | 1         |           |           |         |         |         |         |         |          |          |          |          |          |          |          |         |         |         |            |
|           |           |           |           |           |           |           | 1         |           |           |         |         |         |         |         |          |          |          |          |          |          |          |         |         |         |            |
|           |           |           |           |           |           |           | 1         |           |           |         |         |         |         |         |          |          |          |          |          |          |          |         |         |         |            |
|           |           |           |           |           |           |           | 1         |           |           |         |         |         |         |         |          |          |          |          |          |          |          |         |         |         |            |
|           |           |           |           |           |           |           | 1         |           |           |         |         |         |         |         |          |          |          |          |          |          |          |         |         |         |            |
