# Supplementary material for: Demonstration of Protein-Based Human Identification Using the Hair Shaft Proteome
Source: PubMed Central journal article supplement (PMC5014411; doi:10.1371/journal.pone.0160653), 2016-09-07
Supplement: pone.0160653.s008.pdf [file pone.0160653.s008.pdf]

| GN       | rs#_nuc                               | pept                                                           | Subject                       |                               |     |   |   |   |   |   |   |   |    |    |    |    |    |    |    |    |  |
|----------|---------------------------------------|----------------------------------------------------------------|-------------------------------|-------------------------------|-----|---|---|---|---|---|---|---|----|----|----|----|----|----|----|----|--|
|          |                                       |                                                                | Allele count<br>EUR (n = 379) | Allele count<br>AFR (n = 246) | EA2 | 1 | 3 | 4 | 5 | 6 | 7 | 8 | 12 | 13 | 14 | 15 | 16 | 17 | 18 | 19 |  |
| BLMH     | rs1050565_C                           | HVPEEVLAVLEQEPILPAWDPMGALA-                                    | 213                           | 93                            |     |   |   |   |   |   |   |   |    |    |    |    |    |    |    |    |  |
| BLMH     | rs1050565_T                           | HVPEEVLAVLEQEPILPAWDPMGALA-                                    | 335                           | 228                           | 1   | 1 | 1 |   |   | 1 |   | 1 | 1  | 1  |    | 1  |    | 1  |    |    |  |
| BLMH     | rs1050565_C_T                         | HVPEEVLAVLEQEPILPAWDPMGALA-/HVPEEVLAVLEQEPILPAWDPMGALA-        | 169                           | 75                            |     |   |   | 1 | 1 |   |   |   |    |    |    |    |    | 1  |    |    |  |
| DSP      | rs6929069_A                           | GqSEADSDKNATILELR                                              | 102                           | 158                           |     |   |   |   |   |   |   |   |    | 1  |    |    |    |    |    |    |  |
| DSP      | rs6929069_G                           | GR/SEADSDKNATILELR                                             | 373                           | 211                           |     |   | 1 |   |   |   |   |   |    |    |    |    |    |    |    |    |  |
| ECHS1    | rs1049951_A                           | IFEEDPAVGAIVLTGGDK                                             | 377                           | 185                           |     |   |   |   |   | 1 |   |   |    | 1  |    | 1  | 1  | 1  |    |    |  |
| GSDMA    | rs3894194_A                           | QLNPqGDLTPLDSLIDFK                                             | 264                           | 109                           |     |   |   |   |   |   |   |   |    |    |    |    |    |    |    |    |  |
| GSDMA    | rs3894194_G                           | /GDLTPLDSLIDFK                                                 | 308                           | 225                           | 1   |   | 1 | 1 |   |   |   | 1 |    |    |    | 1  |    | 1  |    |    |  |
| GSDMA    | rs56030650_A                          | GHEVhLEALPK                                                    | 297                           | 220                           |     |   |   |   |   |   |   |   |    |    |    |    |    |    |    |    |  |
| GSDMA    | rs56030650_C                          | GHEVtLEALPK                                                    | 265                           | 117                           |     |   |   |   |   |   |   |   |    |    |    |    |    |    |    |    |  |
| GSDMA    | rs7212938_G                           | ALETvQER                                                       | 277                           | 56                            |     |   |   |   |   |   |   |   |    |    |    |    |    |    |    |    |  |
| GSDMA    | rs7212938_T                           | ALETiQER                                                       | 296                           | 241                           |     |   |   |   |   |   |   |   |    |    |    |    |    |    |    |    |  |
| GSDMA    | rs3894194_A/rs56030650_A              | QLNPqGDLTPLDSLIDFK/GHEVhLEALPK                                 | 242                           | 102                           |     |   |   |   |   | 1 |   |   |    |    |    |    |    |    |    |    |  |
| GSTP1    | rs1695_G                              | YvSLIYTYEAGKDDYVK                                              | 206                           | 175                           |     |   |   | 1 |   | 1 |   |   |    | 1  |    | 1  |    |    |    |    |  |
| GSTP1    | rs1695_A                              | YSLIYTYEAGKDDYVK                                               | 343                           | 203                           | 1   |   |   |   |   |   |   |   |    |    |    |    |    |    | 1  |    |  |
| GSTP1    | rs1695_A_G                            | YSLIYTYEAGKDDYVK /YvSLIYTYEAGKDDYVK                            | 170                           | 132                           |     |   | 1 |   |   |   |   |   |    |    |    |    |    |    |    |    |  |
| HEXB     | rs10805890_G                          | GILvDTSR                                                       | 100                           | 7                             |     |   |   |   |   |   |   |   |    |    |    |    |    |    |    |    |  |
| HEXB     | rs10805890_A                          | GILiDTSR                                                       | 368                           | 243                           |     |   |   | 1 |   |   |   |   |    |    |    |    |    |    | 1  |    |  |
| JUP      | rs143043662_T                         | NEGATYAAALFR                                                   | 5                             | 0                             |     |   |   |   |   |   |   |   |    |    |    |    |    |    |    |    |  |
| JUP      | rs143043662_C                         | NEGATYAAAVLFR                                                  | 379                           | 246                           |     |   |   |   |   |   |   |   |    |    |    |    |    |    |    |    |  |
| JUP      | rs41283425_T                          | SAIVHLINYQDDAELAThALPELTK                                      | 46                            | 0                             |     |   |   |   |   |   |   |   |    |    |    |    |    |    | 1  |    |  |
| JUP      | rs41283425_C                          | SAIVHLINYQDDAELATr                                             | 379                           | 246                           | 1   | 1 |   |   |   | 1 |   | 1 | 1  | 1  | 1  |    |    |    |    |    |  |
| JUP      | rs143043662_T/rs41283425_T_C          | NEGATYAAAVLFR / SAIVHLINYQDDAELAThALPELTK / SAIVHLINYQDDAELATr | 46                            | 0                             |     |   |   | 1 |   |   |   |   |    |    |    |    |    |    |    |    |  |
| JUP      | rs143043662_C/rs41283425_C            | NEGATYAAAVLFR / SAIVHLINYQDDAELATr                             | 379                           | 246                           |     |   |   | 1 |   |   |   |   |    |    |    |    |    |    | 1  |    |  |
| JUP      | rs143043662_T/rs41283425_C            | NEGATYAAALFR / SAIVHLINYQDDAELATr                              | 5                             | 0                             |     |   |   |   | 1 |   |   |   |    |    |    |    |    |    |    |    |  |
| JUP      | rs41283425_T_C                        | SAIVHLINYQDDAELAThALPELTK / SAIVHLINYQDDAELATr                 | 5                             | 0                             |     |   |   |   |   |   |   |   |    |    |    |    |    | 1  |    |    |  |
| KRT1     | rs17678945_A                          | NKLNLDLQALQqKEDLAR                                             | 16                            | 0                             |     |   |   |   |   |   |   |   |    |    |    |    |    |    |    |    |  |
| KRT1     | rs17678945_C                          | NKLNLDLQALQqKEDLAR                                             | 379                           | 246                           |     |   |   |   |   |   |   |   |    | 1  |    | 1  | 1  | 1  | 1  |    |  |
| KRT1     | rs17678945_A_C                        | NKLNLDLQALQqKEDLAR / NKLNLDLQALQqKEDLAR                        |                               |                               |     |   |   | 1 |   |   |   |   |    |    |    |    |    |    |    |    |  |
| KRT31    | rs112544857_A                         | SQYEvLVETNR                                                    | 19                            | 1                             |     |   |   |   |   |   |   |   |    |    |    |    |    |    | 1  |    |  |
| KRT31    | rs6503627_A                           | DNvELENLIR or QLERNvELENLIR                                    | 64                            | 16                            |     |   |   | 1 |   |   |   | 1 |    |    |    |    |    |    |    |    |  |
| KRT32    | rs72830046_T                          | CQYEAAMvEANrR                                                  | 174                           | 24                            |     |   |   |   |   |   |   |   | 1  |    |    |    |    |    |    |    |  |
| KRT32    | rs72830046_C                          | CQYEAAMvEANrR                                                  | 356                           | 246                           |     |   |   |   |   |   |   |   |    |    |    |    |    |    |    |    |  |
| KRT32    | rs2071563_A                           | LEGEINmYR                                                      | 259                           | 163                           |     |   |   |   |   |   |   |   |    | 1  |    |    |    |    |    |    |  |
| KRT32    | rs2071563_G                           | LEGEINTYR                                                      | 315                           | 196                           |     |   |   | 1 |   |   |   | 1 | 1  |    |    |    |    |    | 1  |    |  |
| KRT32    | rs2071561_T                           | ADLEAQVEyLK                                                    | 276                           | 104                           |     |   |   |   |   |   |   |   |    |    |    |    |    |    |    |    |  |
| KRT32    | rs2071563_G/rs2071561_T               | LEGEINTYR / ADLEAQVEyLK                                        | 276                           | 101                           | 1   |   | 1 |   |   | 1 |   |   |    | 1  | 1  | 1  |    | 1  | 1  |    |  |
| KRT32    | rs72830046_C/rs2071563_A              | CQYEAAMvEANRR / LEGEINmYR                                      | 155                           | 163                           |     | 1 |   |   |   |   |   |   |    |    |    |    |    |    |    |    |  |
| KRT32    | rs2071563_A_G/rs2071561_T             | LEGEINTYR / ADLEAQVEyLK                                        |                               |                               |     |   |   |   |   |   |   |   |    |    |    |    |    |    |    |    |  |
| KRT33A   | rs12937519_A                          | QVVSSSEQLSYQvEIELR                                             | 169                           | 147                           |     |   |   |   | 1 |   |   | 1 | 1  | 1  | 1  | 1  | 1  | 1  | 1  |    |  |
| KRT34    | rs2239710_T                           | SQYEALEvNR                                                     | 218                           | 22                            |     | 1 |   |   | 1 | 1 | 1 | 1 | 1  | 1  | 1  | 1  | 1  | 1  | 1  |    |  |
| KRT35    | rs743686_A                            | VSAMySSSpCKLPSLSPVAR                                           | 266                           | 111                           |     |   |   |   |   |   |   |   |    |    |    |    |    |    |    |    |  |
| KRT35    | rs743686_G                            | VSAMySSSpCKLPSLSPVAR                                           | 295                           | 228                           |     |   |   |   |   |   |   |   |    |    |    |    |    |    | 1  |    |  |
| KRT35    | rs12451652_T                          | TNvSPRrPCVPCGGFR                                               | 116                           | 33                            |     |   |   |   |   |   |   |   |    |    |    |    |    |    |    |    |  |
| KRT35    | rs12451652_C                          | TNcSPRrPCVPCGGFR                                               | 363                           | 243                           |     |   |   |   |   |   |   |   |    |    |    |    |    |    |    |    |  |
| KRT35    | rs2071601_C                           | TNcSPRrPCVPCGGFR                                               | 295                           | 220                           |     |   |   |   |   |   |   |   |    |    |    |    |    |    |    |    |  |
| KRT35    | rs2071601_G                           | TNcSPRrPCVPCGGFR                                               | 250                           | 136                           |     |   |   |   |   |   |   |   |    |    |    |    |    |    |    |    |  |
| KRT35    | rs743686_A_G/rs12451652_C/rs2071601_G | VSAMySSSpCKLPSLSPVAR / VSAMySSSpCKLPSLSPVAR / TNcSPRrPCVPCGGFR | 182                           | 92                            |     | 1 |   |   |   |   |   |   |    |    |    |    |    |    |    |    |  |
| KRT37    | rs9910204_A                           | TSFYSTSSCPLCTMAPGAR                                            | 180                           | 73                            |     |   |   |   |   |   |   |   |    |    |    |    |    |    |    |    |  |
| KRT37    | rs9910204_C                           | TSFYSTSSCPLCTMAPGAR                                            | 354                           | 237                           |     |   |   |   |   |   |   |   |    |    |    |    |    |    |    |    |  |
| KRT40    | rs150812789_G                         | TASALEIQAQOSLTSLELCTVAETAQYSSLAQIQ / LIDNLENLQAEIR             | 164                           | 27                            |     | 1 | 1 | 1 |   |   |   |   |    |    |    |    |    |    | 1  |    |  |
| KRT40    | rs150812789_A                         | TASALEIQAQOSLTSLELCTVAETAQYSSLAQIQ/LIDNLENLQAEIR               | 353                           | 244                           |     |   |   |   |   |   |   |   |    |    |    |    |    |    |    |    |  |
| KRT81    | rs6580873_A                           | LYEEIILIQSHISDTSVVVK                                           | 107                           | 11                            |     | 1 |   |   |   |   |   |   |    |    |    |    |    |    | 1  |    |  |
| KRT81    | rs2071588_G                           | GLTGGFGSHSVc                                                   | 212                           | 30                            |     | 1 | 1 |   |   |   | 1 |   |    |    |    |    |    |    |    |    |  |
| KRT81    | rs6580873_A/rs2071588_G               | LYEEIILIQSHISDTSVVVK / GLTGGFGSHSVc                            | 33                            | 1                             |     |   |   | 1 |   |   |   |   |    |    |    |    |    |    |    |    |  |
| KRT83    | rs2852464_C                           | DLNMDcVvAEIK                                                   | 235                           | 179                           |     |   |   |   |   |   |   |   |    |    |    |    |    |    |    |    |  |
| KRT83    | rs2852464_G                           | DLNMDcVvAEIK                                                   | 327                           | 189                           | 1   | 1 | 1 | 1 |   | 1 | 1 | 1 | 1  | 1  | 1  | 1  | 1  | 1  | 1  |    |  |
| KRT85    | rs61630004_T                          | IvAVGGFRAGSCGhSFGYR / AGSCGhSFGY                               | 35                            | 10                            |     |   |   |   |   |   |   |   |    |    |    |    |    |    |    |    |  |
| KRT85    | rs61630004_C                          | IvAVGGFRAGSCGR / AGSCGR                                        | 379                           | 246                           |     |   |   |   |   |   |   |   |    |    |    |    |    |    |    |    |  |
| LRRc15   | rs13070515_A                          | ELSpGfGfGMPmNLR                                                | 150                           | 38                            |     |   |   |   |   |   |   |   |    |    |    |    |    |    |    |    |  |
| LRRc15   | rs13070515_G                          | ELSpGfGfGMPmNLR                                                | 358                           | 242                           |     |   |   | 1 |   |   |   |   |    | 1  | 1  |    | 1  |    | 1  |    |  |
| LRRc15   | rs13060627_T                          | LYLSNNHISQLPPSfFMQLPQLNR                                       | 168                           | 92                            |     |   |   |   |   |   |   |   |    |    |    |    |    |    |    |    |  |
| LRRc15   | rs13060627_C                          | LYLSNNHISQLPPSvFMQLPQLNR                                       | 355                           | 235                           |     |   |   |   |   |   |   |   |    |    |    |    |    |    | 1  |    |  |
| LRRc15   | rs13070515_A_G/rs13060627_T           | ELSpGfGfGMPmNLR / ELSpGfGfGMPmNLR / LYLSNNHISQLPPSfFMQLPQLNR   | 128                           | 34                            |     |   |   | 1 |   |   |   |   |    |    |    |    |    |    |    |    |  |
| LRRc15   | rs13070515_G/rs13060627_C             | ELSpGfGfGMPmNLR / LYLSNNHISQLPPSvFMQLPQLNR                     | 355                           | 235                           |     |   |   |   |   | 1 | 1 |   |    |    |    |    |    |    | 1  |    |  |
| S100A3   | rs36022742_T                          | AiRPLEQAAvAAIVCTfQEYAGR                                        | 32                            | 145                           |     |   |   |   |   |   |   |   |    |    |    |    |    |    |    |    |  |
| S100A3   | rs36022742_C                          | AiRPLEQAAvAAIVCTfQEYAGR                                        | 378                           | 211                           |     |   |   | 1 | 1 | 1 | 1 | 1 | 1  | 1  | 1  | 1  | 1  | 1  | 1  |    |  |
| S100A3   | rs36022742_T_C                        | AiRPLEQAAvAAIVCTfQEYAGR / AiRPLEQAAvAAIVCTfQEYAGR              | 31                            | 110                           |     |   |   | 1 |   |   |   |   |    |    |    |    |    |    |    |    |  |
| SERPINB5 | rs1455555_A                           | GVALSNvHK                                                      | 284                           | 237                           |     |   |   |   |   |   |   |   |    |    |    |    |    |    |    |    |  |
| SERPINB5 | rs1455555_G                           | GVALSNvHK                                                      | 277                           | 73                            |     |   |   |   |   |   |   |   |    | 1  |    |    |    |    |    |    |  |
| TGM3     | rs214803_C                            | AALGVQSNWQvAFNR                                                | 120                           | 206                           |     |   |   |   |   |   |   |   |    |    |    |    |    |    |    |    |  |
| TGM3     | rs214803_A                            | AALGVQSNWQvAFNR                                                | 372                           | 171                           |     |   |   | 1 |   |   |   |   |    |    |    |    |    |    | 1  |    |  |
| TGM3     | rs214803_C_A                          | AALGVQSNWQvAFNR / AALGVQSNWQvAFNR                              | 114                           | 131                           |     |   |   | 1 |   | 1 | 1 | 1 |    |    |    |    | 1  | 1  | 1  |    |  |
