# Supplementary material for: Demonstration of Protein-Based Human Identification Using the Hair Shaft Proteome
Source: PubMed Central journal article supplement (PMC5014411; doi:10.1371/journal.pone.0160653), 2016-09-07
Supplement: pone.0160653.s009.pdf [file pone.0160653.s009.pdf]

|          | EUR (n=379) | AFR (n=246) | rs#_nuc                              | pept                                                         | AA A1 comb | AA A2 comb | AA A3 comb | AA A4 comb | AA A5 comb | Kenyan 1 D1I | Kenyan 2 D2I | Kenyan 3 D3I | Kenyan 4 D4I | Kenyan 5 D5B |
|----------|-------------|-------------|--------------------------------------|--------------------------------------------------------------|------------|------------|------------|------------|------------|--------------|--------------|--------------|--------------|--------------|
| JUP      | 46          | 5           | RS41283425                           | SAIVHLINYQDDAELATHALPELTK                                    |            |            |            |            |            |              |              |              |              |              |
| JUP      | 379         | 246         | RS41283425                           | SAIVHLINYQDDAELATR                                           | 1          | 1          | 1          |            | 1          |              |              | 1            |              |              |
| KRT31    | 64          | 16          | rs6503627                            | DNVELENLIR                                                   |            |            |            |            |            |              |              |              | 1            |              |
| KRT31    | 19          | 1           | rs112544857                          | SQYEVLVETNR                                                  |            |            |            |            |            |              |              |              |              |              |
| KRT31    | 0           | 1           | rs146247884                          | QNOEQYQmLLDVR                                                |            |            |            |            |            |              |              |              | 1            |              |
| KRT32    | 276         | 104         | rs2071561_T                          | ADLEAQVEyLK                                                  |            |            |            |            |            |              |              |              |              |              |
| KRT32    | 315         | 196         | rs2071563_G                          | LEGEINTYR                                                    |            |            |            |            | 1          |              | 1            |              |              |              |
| KRT32    | 184         | 133         | rs2071563_A                          | LEGEINmYR                                                    |            |            |            |            |            |              |              |              |              |              |
| KRT32    | 120         | 83          | rs2071563_G_A                        | LEGEINTYR/LEGEINmYR                                          |            |            |            |            |            |              |              |              |              |              |
| KRT32    | 356         | 246         | rs72830046_C                         | CQYEAMVEANRR                                                 |            |            |            |            |            |              |              |              |              |              |
| KRT32    | 174         | 24          | rs72830046_T                         | CQYEAMVEANhR                                                 |            |            |            |            |            |              |              |              |              |              |
| KRT32    | 151         | 24          | rs72830046_C_T                       | CQYEAMVEANRR/CQYEAMVEANhR                                    |            |            |            |            |            |              |              |              |              |              |
| KRT32    | 275         | 101         | rs2071561_T/rs2071563_G              | ADLEAQVEyLK/LEGEINTYR                                        |            |            |            |            |            |              |              |              |              |              |
| KRT32    | 161         | 47          | rs2071561_T/rs2071563_G_A            | ADLEAQVEyLK/LEGEINTYR/LEGEINmYR                              |            |            |            |            |            |              |              |              | 1            |              |
| KRT32    | 161         | 50          | rs2071561_T/rs2071563_A              | ADLEAQVEyLK/LEGEINmYR                                        |            |            | 1          |            |            |              |              |              |              |              |
| KRT32    | 100         | 6           | rs2071563_G_A/                       | LEGEINTYR/LEGEINmYR/CQYEAMVEANhR                             | 1          |            |            |            |            |              |              |              |              |              |
| KRT32    | 147         | 11          | rs2071561_T/rs2071563_G/rs72830046_T | ADLEAQVEyLK/LEGEINTYR/CQYEAMVEANhR                           |            |            |            | 1          |            |              |              |              |              |              |
| KRT32    | 292         | 196         | rs2071563_G/rs72830046_C             | LEGEINTYR/CQYEAMVEANRR                                       |            |            |            |            | 1          |              | 1            |              |              |              |
| KRT32    | 172         | 24          | rs2071563_G/rs72830046_T             | LEGEINTYR/CQYEAMVEANhR                                       |            |            |            |            |            |              |              |              |              |              |
| KRT33A   | 169         | 147         | rs12937519_A                         | QVVSSEQLQSYQVEIELR                                           |            |            |            | 1          |            | 1            | 1            | 1            | 1            | 1            |
| KRT33B   | 0           | 5           | rs114488848_G                        | TINALIEIQLAQHNLR                                             |            |            |            |            |            |              | 1            |              |              |              |
| KRT34    | 218         | 22          | rs2239710_T                          | SQYEAALVEINR                                                 |            |            |            | 1          |            |              |              |              | 1            |              |
| KRT35    | 295         | 228         | RS743686_G                           | VSAMYSSSpCKLPSLSPVAR                                         |            | 1          | 1          | 1          |            | 1            |              |              |              |              |
| KRT35    | 266         | 111         | RS743686_A                           | VSAMYSSSCKLPSLSPVAR                                          |            |            |            |            |            |              |              |              | 1            |              |
| KRT35    | 182         | 93          | RS743686_G_A                         | VSAMYSSSpCKLPSLSPVAR/VSAMYSSSCKLPSLSPVAR                     |            |            |            |            |            |              |              |              |              |              |
| KRT35    | 379         | 246         | rs138303882_G                        | YETEVSRLQLVESDINGLR                                          |            |            |            |            |            |              |              |              | 1            |              |
| KRT35    | 0           | 2           | rs138303882_A/                       | YETEVSRLQLVESDINGLR                                          |            |            |            |            |            |              |              |              |              |              |
| KRT35    | 0           | 1           | RS743686_A/rs138303882_G_A           | VSAMYSSSCKLPSLSPVAR/YETEVSRLQLVESDINGLR /YETEVSRLQLVESDINGLR |            |            |            |            | 1          |              |              |              |              |              |
| KRT35    | 0           | 2           | RS743686_A/rs138303882_G             | VSAMYSSSpCKLPSLSPVAR/YETEVSRLQLVESDINGLR                     |            |            |            |            |            |              | 1            |              |              |              |
| KRT37    | 354         | 237         | rs9910204_C                          | TSFYSTSSCPLGCTMAPGAR                                         |            |            |            |            |            |              |              |              |              | 1            |
| KRT37    | 180         | 73          | rs9910204_A                          | TSFYSTSSCPLCTMAPGAR                                          |            |            |            |            |            |              |              |              |              |              |
| KRT40    | 353         | 244         | RS150812789_A                        | TASALEIELQAQQLTESLECTVAETEAAQYSSQLAQIQLDNLENQLAEIR           |            |            |            |            |            |              |              |              |              |              |
| KRT40    | 164         | 27          | RS150812789_G                        | TASALEIELQAQQLTESLECTVAETEAAQYSSQLAQIQR or /LIDNLENQLAEIR    |            |            |            |            |            |              |              |              |              |              |
| KRT40    | 245         | 228         | rs2010027_C                          | NHEEEVNLLRQLGDR                                              |            |            |            |            |            |              |              |              |              |              |
| KRT40    | 309         | 117         | rs2010027_T                          | NHEEEVNLLhQLGDR                                              |            |            |            |            | 1          |              |              |              |              |              |
| KRT40    | 164         | 27          | RS150812789_G/rs2010027_C            | /LIDNLENQLAEIR; NHEEEVNLLRQLGDR                              |            |            |            |            |            |              |              |              | 1            |              |
| KRT81    | 107         | 11          | rs6580873_A                          | LYEEELIQSHISDTSVVVK                                          |            |            |            |            |            |              |              |              |              |              |
| KRT81    | 212         | 30          | rs2071588_G                          | GLTGGFGSHSVCr                                                |            |            |            |            |            |              |              |              | 1            |              |
| KRT81    | 379         | 232         | rs79897879_T                         | FSCISACGPRPGR                                                |            |            |            |            |            |              |              |              | 1            | 1            |
| KRT81    | 3           | 103         | rs79897879_G                         | FrCISACGPRPGR                                                |            |            |            |            |            |              |              |              |              |              |
| KRT81    | 1           | 9           | rs2071588_G/rs79897879_G             | GLTGGFGSHSVCr; FrCISACGPRPGR                                 |            |            |            | 1          |            |              |              |              |              |              |
| KRT82    | 278         | 140         | rs2658658_G                          | GAFLYEPGGVSTPVLSTGVLR                                        |            |            |            | 1          |            |              |              |              |              |              |
| KRT82    | 302         | 216         | rs2658658_A                          | GAFLYEPGGVSmPVLSTGVLR                                        |            |            |            |            | 1          |              |              |              |              |              |
| KRT83    | 327         | 189         | rs2852464_G                          | DLNMDCVAEIK or                                               | 1          |            |            |            | 1          |              |              |              |              |              |
| KRT83    | 235         | 179         | rs2852464_C                          | DLNMDCmVAEIK                                                 |            |            |            |            |            |              | 1            |              |              |              |
| KRT83    | 183         | 122         | rs2852464_G_A                        | DLNMDCVAEIK/DLNMDCmVAEIK                                     |            |            | 1          |            | 1          |              |              | 1            |              | 1            |
| KRT83    | 0           | 19          | rs140635030_T                        | LEAAVAQSEQSeEAALSAR                                          |            |            |            |            |            |              |              |              |              |              |
| KRT83    | 0           | 10          | rs2852464_C_G/rs140635030_T          | DLNMDCVAEIK/DLNMDCmVAEIK/LEAAVAQSEQSeEAALSAR                 |            |            | 1          | 1          |            |              |              |              |              |              |
| KRT84    | 357         | 245         | RS951773_G                           | QLrEYQELMNAKGLDIEIATYR                                       | 1          | 1          | 1          | 1          | 1          |              | 1            | 1            |              |              |
| KRT84    | 182         | 41          | RS951773_A                           | CEYQELMNAKGLDIEIATYR                                         |            |            |            |            |            |              |              |              |              |              |
| KRT86    | 0           | 16          | rs139895699_T                        | TKEIENLNCMIQR                                                |            | 1          |            |            |            |              |              |              |              |              |
| KRTAP3-2 | 377         | 167         | rs9897046_T                          | MDCCASRSCSVPTGPATICSSDKSCR                                   |            |            |            | 1          | 1          | 1            | 1            | 1            | 1            | 1            |
| LRC15    | 358         | 242         | rs13070515_G                         | ELSPGIFGMPMNLr                                               |            |            |            |            | 1          |              |              |              |              |              |
| LRC15    | 150         | 38          | rs13070515_A                         | ELSIGIFGMPMNLr                                               |            |            |            |            |            |              |              |              |              |              |
| LRC15    | 129         | 34          | rs13070515_G_A                       | ELSPGIFGMPMNLr / ELSIGIFGMPMNLr                              |            |            |            |            |            |              |              |              |              |              |
| LRC15    | 355         | 235         | rs13060627_C                         | LYLSNNHISQLPPSFMQLPQLNR                                      |            | 1          |            |            |            |              |              |              |              | 1            |
| LRC15    | 168         | 92          | rs13060627_A                         | LYLSNNHISQLPPSIFMQLPQLNR                                     |            |            |            |            |            |              |              |              |              |              |
| S100A3   | 378         | 211         | RS36022742_C                         | ARPLEQAAVAIVCTFQEYAGR                                        |            |            | 1          | 1          | 1          |              | 1            |              |              |              |
| S100A3   | 32          | 145         | RS36022742_T                         | AKPLEQAAVAIVCTFQEYAGR                                        |            |            |            |            |            |              |              |              | 1            | 1            |
| S100A3   | 31          | 110         | RS36022742_C_T                       | ARPLEQAAVAIVCTFQEYAGR/AKPLEQAAVAIVCTFQEYAGR                  |            |            |            |            | 1          |              |              |              | 1            | 1            |
| S100A3   | 379         | 246         | rs116208483_G                        | FMSVLDTNKDFVEYVr                                             | 1          | 1          | 1          | 1          | 1          |              | 1            | 1            | 1            | 1            |
| S100A3   | 27          | 0           | rs116208483_C                        | FMSVLDTNKDFVEYVr                                             |            |            |            |            |            |              |              |              |              |              |
| TCHH     | 0           | 16          | rs2515663                            | TVDLLELDL                                                    |            |            |            |            |            |              |              |              |              |              |
| TCHH     | 379         | 245         |                                      | TVDLLELDLr                                                   |            |            |            |            |            |              | 1            |              |              |              |
