# Supplementary material for: Demonstration of Protein-Based Human Identification Using the Hair Shaft Proteome
Source: PubMed Central journal article supplement (PMC5014411; doi:10.1371/journal.pone.0160653), 2016-09-07
Supplement: pone.0160653.s010.pdf [file pone.0160653.s010.pdf]

## Publically available proteomic datasets

| <b>MS</b>         | <b>Treatment</b> | <b>Subject</b> | <b>GPM accession #</b> |
|-------------------|------------------|----------------|------------------------|
| Thermo Hybr II    |                  | C0001          | GPM32100009022         |
| Thermo Hybr II    |                  | <b>C0001</b>   | GPM32100009016         |
| Thermo Hybr II    |                  | <b>C0003</b>   | GPM32100009096         |
| Thermo Hybr II    |                  | <b>C0004</b>   | GPM32100010108         |
| Thermo Hybr II    |                  | <b>C0005</b>   | GPM32100008962         |
| Thermo Hybr II    |                  | <b>C0005</b>   | GPM32100008970         |
| Thermo Hybr II    |                  | <b>C0006</b>   | GPM32100009512         |
| Thermo Hybr II    |                  | <b>C0007</b>   | GPM32100010750         |
| Thermo Hybr II    |                  | <b>C0008</b>   | GPM32100009533         |
| Thermo Hybr II    |                  | <b>C0009</b>   | GPM32100009569         |
| Thermo Hybr II    |                  | <b>C0013</b>   | GPM32100009570         |
| Thermo Hybr II    |                  | <b>C0014</b>   | GPM32100009571         |
| Thermo Hybr II    |                  | <b>C0015</b>   | GPM32100009572         |
| Thermo Hybr II    |                  | <b>C0016</b>   | GPM32100009575         |
| Thermo Hybr II    |                  | <b>C0016</b>   | GPM32100009580         |
| Thermo Hybr II    |                  | <b>C0017</b>   | GPM32100009014         |
| Thermo Hybr II    |                  | <b>C0018</b>   | GPM32100010850         |
| Thermo Hybr II    |                  | <b>C0019</b>   | GPM32100009152         |
| Bruker maXis IIIA |                  | <b>C0019</b>   | GPM32100032293         |
| Bruker maXis IIIA |                  | <b>C0018</b>   | GPM32100032294         |
| Bruker maXis IIIA |                  | <b>C0017</b>   | GPM32100032295         |
| Bruker maXis IIIA |                  | <b>C0016</b>   | GPM32100032296         |
| Bruker maXis IIIA |                  | <b>C0014</b>   | GPM32100032298         |
| Bruker maXis IIIA |                  | <b>C0015</b>   | GPM32100032297         |
| Bruker maXis IIIB |                  | <b>C0018</b>   | GPM32100011243         |
| Bruker maXis IIIB |                  | <b>C0013</b>   | GPM32100011264         |
| Bruker maXis IIIB |                  | <b>C0015</b>   | GPM32100032299         |
| Bruker maXis IIIB |                  | <b>C0003</b>   | GPM32100032300         |
| Bruker maXis IIIB |                  | <b>C0006</b>   | GPM32100032311         |
| Bruker maXis IIIB |                  | <b>C0012</b>   | GPM32100032312         |
| Bruker maXis IIIB |                  | <b>C0017</b>   | GPM32100032316         |
| Bruker maXis IIIB |                  | <b>C0019</b>   | GPM32100032313         |
| Bruker maXis IIIB |                  | <b>C0001</b>   | GPM32100032317         |
| Bruker maXis IIIB |                  | <b>C0014</b>   | GPM32100032318         |
| Bruker maXis IIIA |                  | <b>C0016</b>   | GPM32100032319         |
| Bruker maXis II   |                  | <b>C0014</b>   | GPM32100032323         |
| Bruker maXis II   |                  | <b>C0007</b>   | GPM32100010859         |

|                 |              |                |
|-----------------|--------------|----------------|
| Bruker maXis II | <b>C0008</b> | GPM32100010971 |
| Bruker maXis II | <b>C0007</b> | GPM32100011141 |
| Bruker maXis II | <b>C0004</b> | GPM32100032324 |
| Bruker Maxis II | <b>C0005</b> | GPM32100011285 |
| Bruker Maxis II | <b>C0005</b> | GPM32100011294 |
| Bruker Maxis II | <b>C0005</b> | GPM32100011356 |
| Agilent qToF I  | L1.001.1C    | GPM32100011293 |
| Agilent qToF I  | L1.002.1C    | GPM32100011454 |
| Agilent qToF I  | L1.003.1C    | GPM32100011452 |
| Agilent qToF I  | L1.004.1C    | GPM32100011494 |
| Agilent qToF I  | L1.005.1C    | GPM32100011511 |
| Agilent qToF I  | C0003        | GPM32100011519 |
| Agilent qToF I  | L1.006.1C    | GPM32100011512 |
| Agilent qToF I  | L1.007.1C    | GPM32100011520 |
| Agilent qToF I  | L1.008.1C    | GPM32100011694 |
| Agilent qToF I  | L1.009.1C    | GPM32100011609 |
| Agilent qToF I  | L1.012.1C    | GPM32100015905 |
| Agilent qToF I  | C0003        | GPM32100015967 |
| Agilent qToF I  | L1.013.1C    | GPM32100016095 |
| Agilent qToF I  | L1.014.1C    | GPM32100016121 |
| Agilent qToF I  | L1.015.1C    | GPM32100016639 |
| Agilent qToF I  | L1.016.1C    | GPM32100016637 |
| Agilent qToF I  | C0005.1      | GPM32100016642 |
| Agilent qToF I  | C0017.1      | GPM32100016696 |
| Agilent qToF I  | L1.017.1C    | GPM32100016779 |
| Agilent qToF I  | L1.019.1C    | GPM32100016876 |
| Agilent qToF I  | L1.021.1C    | GPM32100016939 |
| Agilent qToF I  | L1.026.1C    | GPM32100016941 |
| Agilent qToF I  | C0003        | GPM32100016949 |
| Agilent qToF I  | L1.029.1C    | GPM32100016942 |
| Agilent qToF I  | L1.030.1C    | GPM32100017523 |
| Agilent qToF I  | L1.031.1C    | GPM32100017613 |
| Agilent qToF I  | L1.032.1C    | GPM32100017585 |
| Agilent qToF I  | L1.033.1C    | GPM32100017609 |
| Agilent qToF I  | L1.037.1C    | GPM32100016952 |
| Agilent qToF I  | L1.039.1C    | GPM32100016953 |
| Agilent qToF I  | L1.040.1C    | GPM32100027585 |
| Agilent qToF I  | L1.041.1C    | GPM32100027631 |
| Agilent qToF I  | L1.042.1C    | GPM32100027657 |
| Agilent qToF I  | L1.046.1C    | GPM32100027678 |

|                |           |                |
|----------------|-----------|----------------|
| Agilent qToF I | L1.048.1C | GPM32100027679 |
| Agilent qToF I | L1.047.1C | GPM32100027683 |
| Agilent qToF I | L1.050.1C | GPM32100031254 |
| Agilent qToF I | L1.051.1C | GPM32100031313 |
| Agilent qToF I | C0003     | GPM32100031986 |
| Agilent qToF I | L1.020.1C | GPM32100031306 |
| Agilent qToF I | L1.023.1C | GPM32100031318 |
| Agilent qToF I | L1.028.1C | GPM32100031319 |
| Agilent qToF I | L1.035.1C | GPM32100031330 |
| Agilent qToF I | L1.036.1C | GPM32100031321 |
| Agilent qToF I | C0003     | GPM32100031329 |
| Agilent qToF I | L1.038.1C | GPM32100031323 |
| Agilent qToF I | L1.044.1C | GPM32100031334 |
| Agilent qToF I | L1.045.1C | GPM32100031349 |
| Agilent qToF I | L1.049.1C | GPM32100031577 |
| Agilent qToF I | L1.052.1C | GPM32100031574 |
| Agilent qToF I | L1.053.1C | GPM32100031768 |
| Agilent qToF I | L1.054.1C | GPM32100031833 |
| Agilent qToF I | L1.057.1C | GPM32100031830 |
| Agilent qToF I | L1.058.1C | GPM32100031840 |
| Agilent qToF I | L1.059.1C | GPM32100031838 |
| Agilent qToF I | L1.060.1C | GPM32100031941 |
| Agilent qToF I | L1.001.2C | GPM32100031957 |
| Agilent qToF I | L1.056.2C | GPM32100031959 |
| Agilent qToF I | L1.055.2C | GPM32100031958 |
| Agilent qToF I | C0003     | GPM32100031975 |
