# Supplementary material for: Demonstration of Protein-Based Human Identification Using the Hair Shaft Proteome
Source: PubMed Central journal article supplement (PMC5014411; doi:10.1371/journal.pone.0160653), 2016-09-07
Supplement: pone.0160653.s014.pdf [file pone.0160653.s014.pdf]

| Gene Name | rs Number              | Hg19 Coordinate of variant      | Annealing temp | size | primer for seq | Forward Primer Sequence  | Reverse Primer Sequence   |
|-----------|------------------------|---------------------------------|----------------|------|----------------|--------------------------|---------------------------|
| KRT81     | rs6580873              | chr12:52681925                  | 64             | 287  | F              | CTGCGGGTGACAATGTCTG      | GTGGGAGTGTGGACAGGAT       |
| KRT83     | rs2852464              | chr12:52710721                  | 64             | 239  | F              | GTGTCCTGTGCCGCTCAC       | GGGATTAGGAGAAGCCCA        |
| KRT31     | rs6503627              | chr17:39553547                  | 64             | 388  | F              | TTCTGTGGAGCTCTCAAT       | TCTGTCTTCAGCCAGGCACT      |
| LRRC15    | rs13070515             | chr3:194080916                  | 61.4           | 274  | F              | GGGAGATGAAGCTGATCTGA     | AACAACCACAACCTCCAGAGA     |
| BLMH      | rs1050565              | chr17:28576076                  | 58.3           | 250  | F              | TTCAGTCCCTGGATCTGTCC     | TCATAAGTCTTCTGTTCTTTCTCCA |
| HEXB      | rs10805890             | chr5:73992881                   | 54             | 220  | F              | TCATTGAGTTCAAGACAACAGAAA | GGAGACATCTTCAGAATAGACAACA |
| KRT33A    | rs12937519             | chr17:39503163                  | 64             | 336  | F              | GGTGGGAAGATTGAGAGTG      | GAGGCAGGGTCTGATCCTTT      |
| GSTP1     | rs1695                 | chr11:67352689                  | 54             | 230  | F              | TCCCCAGTGACTGTGTGTG      | GCACAAGAAGCCCTTTCT        |
| SERPINB5  | rs1455555              | chr18:61170782                  | 54             | 222  | F              | CCAATGCCAAGGTCAAACCTC    | CTCCTGGCACCTCTATGGAA      |
| GSDMA     | rs3894194              | chr17:38121993                  | 58.3           | 241  | F              | TCAGAGCCGGGTAACCTCTC     | CTTCTCTTCCTCAGACCA        |
| KRT34     | rs2239710              | chr17:39535859                  | 54.8           | 244  | R              | TGAGTGGCCATGTGCTTAGA     | CAGGAAAATGGCAGATCCA       |
| JUP       | rs143043662            | chr17:39913771                  | 63.4           | 179  | F              | GCTTGAAGAGGGAGTTGGTG     | AGGAGGCTGGTCCCCT          |
| KRT81     | rs2071588              | chr12:52685096                  | 63.4           | 247  | F              | GACCGACACGGTGGTGAT       | GACCTGCGGATCAGGATTT       |
| KRT31     | rs112544857            | chr17:39551763                  | 58             | 323  | F              | AAGGGGAGAAAGGATCAGAC     | CAGGGTTTCAACAAGCAATG      |
| KRT1      | rs17678945             | chr12:53070174                  | 58             | 226  | F              | GTCCCTTCTCACCTGCTT       | CTTGACAGTCCATCAGTG        |
| LRRC15    | rs13060627             | chr3:194080983                  | 54.8           | 147  | R              | CCCAAAGAGAGTAAGACGGTTG   | CAGAACCAGATTGGACTGCTC     |
| GSDMA     | rs56030650             | chr17:38131187                  | 54.8           | 267  | F              | ACATGAGGCCTCGAAAAAGA     | TGAAGACCTTATCCCACT        |
| KRT32     | rs2071563              | chr17:39619115                  | 54             | 295  | F              | TTCTATAACCTCCAGAATCC     | TCCTTTGCCCTAGAGGGACT      |
| KRT32     | rs2071561              | chr17:39622068                  | 54.8           | 243  | F              | GTTCTCCCTCTGCTTC         | TTCACTTGGTTGCTGAC         |
| DSP       | rs6929069              | chr6:7581636                    | 64             | 349  | F              | TGGCCACCTGAGGGAAAAGC     | CTGCAGCTGGCTCCTTAGTT      |
| GSDMA     | rs7212938              | chr17:38122680                  | 64             | 375  | F              | CTGCAGACCCAACAGACACT     | GGAGGTGTGACTAGGAAATGG     |
| JUP       | rs41283425             | chr17:39925713                  | 62.1           | 387  | F              | GCCCCAGTCAGACTCATCAC     | GAGTACCAGATGCCACAACAGC    |
| KRT35     | rs743686               | chr17:39637244                  | 62.5           | 395  | F              | TCGTTCAGGGATTGCATGGT     | CTGGGGTAAGGAGCTGCTTC      |
| KRT40     | rs150812789            | chr17:39135207                  | 62.1           | 408  | F              | CATCAGCCTCTTTGTGACTC     | AACTGAGACTCACAGAAGC       |
| S100A3    | rs36022742             | chr1:153520954                  | 62             | 403  | F              | CCCCAGTCTCTCTTTGCAG      | AATTAGGAGGGCTGGTGTG       |
| TGM3      | rs214803               | chr20:2290333                   | 64             | 310  | F              | GAATTTGGCTCTGCCCTTGAC    | GGGAATGAGCAGGTACCTGTG     |
| KRT85     | rs112554450            | chr12:52758810                  | 64             | 383  | F              | CCACTGGATATCTGCTCTGGG    | AGGCTCCCTCTGACTTCTC       |
| KRT32     | rs11078993             | chr17:39619193                  | 60.2           | 273  | R              | GTCCAGCAGCACCTGGTAC      | GGTGTAGGGAGGGCTCATT       |
| KRT35     | rs2071601 & rs12451652 | chr17:39633349 & chr17:39633354 | 54             | 388  | F              | TGGGTAGAGGCCAAGTTCAA     | CATCACGTGACTCCAGCAAG      |
| KRT85     | rs61630004             | chr12:52760957                  | Betaine20%TD   | 321  | F              | TCCTTCTCCTCTGCTTCAC      | CAGCTCTGCTCAGCTGTG        |
| KRT37     | rs9910204              | chr17:39580739                  | Betaine20%TD   | 367  | F              | CCATTGAGGGTGTGTTTTC      | AGTCTCAGTGGCTCAGCCTTC     |
| KRT32     | rs72830046             | chr17:39620565                  | 54             | 330  | R              | GGCCCACTGCATATTGAAC      | TTGAAAGACTGGGATGCT        |
