# Supplementary material for: Demonstration of Protein-Based Human Identification Using the Hair Shaft Proteome
Source: PubMed Central journal article supplement (PMC5014411; doi:10.1371/journal.pone.0160653), 2016-09-07
Supplement: pone.0160653.s023.pdf [file pone.0160653.s023.pdf]

| <b>LRR15</b>                                                                                                          |                   | <b>EUR</b> |              | <b>AFR</b> |              |
|-----------------------------------------------------------------------------------------------------------------------|-------------------|------------|--------------|------------|--------------|
| <b>rs13070515</b>                                                                                                     | <b>rs13060627</b> | <b>sum</b> | <b>gf</b>    | <b>sum</b> | <b>gf</b>    |
| G G                                                                                                                   | C C               | 210        | 0.554        | 154        | 0.626        |
| G G                                                                                                                   | (C T, T C)        | 19         | 0.050        | 51         | 0.207        |
| G G                                                                                                                   | T T               | 0          | 0.000        | 3          | 0.012        |
| (G A, A G)                                                                                                            | C C               | 1          | 0.003        | 0          | 0.000        |
| (G A, A G)                                                                                                            | (C T, T C)        | 125        | 0.330        | 30         | 0.122        |
| (G A, A G)                                                                                                            | T T               | 3          | 0.008        | 4          | 0.016        |
| A A                                                                                                                   | C C               | 0          | 0.000        | 0          | 0.000        |
| A A                                                                                                                   | (C T, T C)        | 0          | 0.000        | 0          | 0.000        |
| A A                                                                                                                   | T T               | 21         | 0.055        | 4          | 0.016        |
| G=ELSPGIFGMPNLR C=LYLSNNHISQLPPSVFMQLPQLNR<br>A=ELSIGIFGMPNLR T=LYLSNNHISQLPPSiFMQLPQLNR<br><b>P286L</b> <b>V264I</b> |                   | <b>379</b> | <b>1.000</b> | <b>246</b> | <b>1.000</b> |
